# 1 **Live-cell mapping of organelle-associated RNAs via proximity biotinylation** 2 **combined with protein-RNA crosslinking**

## 3 **Authors/Affiliations**

4 Pornchai Kaewsapsak<sup>1,5</sup>, David M. Shechner<sup>2-3,5</sup>, William Mallard<sup>2-3</sup>, John L. Rinn<sup>2-3</sup>,  
5 and Alice Y. Ting<sup>1,4,6\*</sup>

6 <sup>1</sup>Department of Chemistry, Massachusetts Institute of Technology, Cambridge,  
7 Massachusetts, USA;

8 <sup>2</sup>Department of Stem Cell and Regenerative Biology, and Molecular and Cellular  
9 Biology, Harvard University, Cambridge, Massachusetts, USA

10 <sup>3</sup>Broad Institute of Massachusetts Institute of Technology and Harvard, Cambridge,  
11 Massachusetts, USA

12 <sup>4</sup>Departments of Genetics, Biology, and Chemistry, Stanford University, Stanford, CA,  
13 USA

14 <sup>5</sup>Co-first authors

15 <sup>6</sup>Lead Contact

16 \*Correspondence: [ayting@stanford.edu](mailto:ayting@stanford.edu)

17

## 18 **Keywords**

19 RNA localization, Subcellular Transcriptomics, Sequencing Technologies,  
20 Peroxidase, APEX2, Horseradish Peroxidase, FISH, RNA-Seq, Mammalian Cell RNA  
21 Analysis

22

## 23 **Abstract**

24 The spatial organization of RNA within cells is a crucial factor in a wide range of  
25 biological functions, spanning all kingdoms of life. However, a general  
26 understanding of RNA localization has been hindered by a lack of simple, high-  
27 throughput methods for mapping the transcriptomes of subcellular compartments.  
28 Here, we develop such a method, termed APEX-RIP, which combines peroxidase-  
29 catalyzed, spatially restricted in situ protein biotinylation with RNA-protein  
30 chemical crosslinking. We demonstrate that, using a single protocol, APEX-RIP can  
31 isolate RNAs from a variety of subcellular compartments, including the  
32 mitochondrial matrix, nucleus, bulk cytosol, and endoplasmic reticulum (ER), with  
33 higher specificity and coverage than do conventional approaches. We furthermore  
34 identify candidate RNAs localized to mitochondria-ER junctions and nuclear lamina,  
35 two compartments that are recalcitrant to classical biochemical purification. Since  
36 APEX-RIP is simple, versatile, and does not require special instrumentation, we  
37 envision its broad application in a variety of biological contexts.

38

## 39 **Introduction**

40 Spatial compartmentalization of RNA is central to many biological processes across  
41 all kingdoms of life, and enables diverse regulatory schemes that exploit both coding  
42 and noncoding functions of the transcriptome. For example, the localization and  
43 spatially restricted translation of mRNA plays a fundamental role in asymmetric cell  
44 division in bacteria and yeast, body-pattern formation in *Drosophila* and *Xenopus*,  
45 signaling at mammalian neuronal synapses (Jung et al. 2014), and a wide variety of

46 other biological contexts. In another example, the localization of noncoding RNAs  
47 (ncRNAs) can play an architectural role in the assembly of subcellular structures,  
48 including short-range chromatin loops, higher-order chromatin domains, and large  
49 sub-nuclear structures like nucleoli and Barr bodies (Rinn and Guttman 2014;  
50 Engreitz, Ollikainen, and Guttman 2016). However, despite these examples, our  
51 general understanding of the breadth and biological significance of RNA subcellular  
52 localization remains inchoate.

53 Techniques that elucidate the subcellular localization of RNAs are therefore  
54 critical for advancing our understanding of RNA biology. Classically, such techniques  
55 rely either on imaging or biochemical approaches. Imaging methods—such as  
56 Fluorescence *In Situ* Hybridization (FISH) and artificial RNA reporter schemes—are  
57 powerful tools for elucidating the positions of a small number of target RNAs at low-  
58 to-moderate throughput (Wilk et al. 2016; K. H. Chen et al. 2015; Paige, Wu, and  
59 Jaffrey 2011; Hocine et al. 2013; Nelles et al. 2016). Alternatively, unbiased  
60 approaches for RNA discovery couple biochemical manipulations to deep  
61 sequencing. For example, the RNA partners of proteins with characteristic  
62 subcellular localization can be identified through a variety of techniques that couple  
63 protein immunoprecipitation to RNA-seq (Ule et al. 2003; Christopher Gilbert et al.  
64 2004). Such methods have revealed many localized mRNAs, in addition to novel  
65 non-coding RNAs involved in RNA splicing (Chi et al. 2009) and RNAi (Motamedi et  
66 al. 2004). On a broader scale, a deep sampling of RNAs residing within a cellular  
67 compartment—for example, an intact organelle of interest, or partitions along a  
68 sucrose gradient, can be identified by coupling subcellular fractionation to RNA-Seq  
69 (“Fractionation-Seq”) (Sterne-Weiler et al. 2013; Mercer et al. 2011).

70 However, a technological gap exists among these current methods for  
71 studying RNA localization. Imaging approaches are of limited throughput, and may  
72 require specialized reagents, constructs, or microscopes that are only accessible to a  
73 handful of laboratories (Wilk et al. 2016; K. H. Chen et al. 2015; Paige, Wu, and  
74 Jaffrey 2011; Hocine et al. 2013; Nelles et al. 2016). The efficacy of  
75 immunoprecipitation-based approaches is highly sensitive to the antibodies and  
76 enrichment protocols used (Hendrickson et al. 2016) and captures only RNAs that  
77 are directly complexed with each target protein. Fractionation-Seq is applicable only  
78 to organelles and subcellular fractions that can be purified, and is frequently  
79 complicated by contaminants (false positives) and loss of material (false negatives)  
80 Therefore, a new technology is needed for unbiased and large-scale discovery and  
81 characterization of RNA *neighborhoods*, with high spatial specificity, and within  
82 cellular structures that cannot be enriched by biochemical fractionation.

83 Here we introduce such a technology—termed APEX-RIP— that enables  
84 unbiased discovery of endogenous RNAs in specific cellular locales. APEX-RIP  
85 merges two existing technologies: APEX (engineered ascorbate peroxidase)-  
86 catalyzed proximity biotinylation of endogenous proteins (Rhee et al. 2013), and  
87 RNA ImmunoPrecipitation (RIP) (Christopher Gilbert et al. 2004). We demonstrate  
88 that APEX-RIP is able to enrich endogenous RNAs in membrane-enclosed cellular  
89 organelles, such as the mitochondrion and nucleus, and in membrane-abutting  
90 cellular regions such as the cytosolic face of the endoplasmic reticulum. The  
91 specificity and coverage of this approach are much higher than those obtained by

92 traditional Fractionation-Seq. Moreover, by applying APEX-RIP to multiple  
93 mammalian organelles, we have generated high quality datasets of  
94 compartmentalized RNAs that should serve as valuable resources for testing and  
95 generating novel hypotheses pertinent to RNA biology.

### 97 **Development of APEX-RIP method and application to mitochondria**

98 APEX is an engineered peroxidase that can be targeted by genetic fusion to various  
99 subcellular regions of interest (Rhee et al. 2013) (Figure 1A). Upon addition of its  
100 substrates, biotin-phenol (BP) and hydrogen peroxide ( $H_2O_2$ ), to live cells, APEX  
101 catalyzes the formation of biotin-phenoxy radicals that then diffuse outward and  
102 covalently biotinylate nearby endogenous proteins. More distal proteins are not  
103 significantly labeled because the biotin-phenoxy radical has a half-life of less than 1  
104 millisecond (Wishart and Madhava Rao 2010). Previous work has shown that APEX-  
105 catalyzed proximity biotinylation, coupled to streptavidin enrichment and mass  
106 spectrometry, can generate proteomic maps of the mitochondrial matrix,  
107 intermembrane space, outer membrane, and nucleoid, each with <5 nm spatial  
108 specificity (Rhee et al. 2013; Hung et al. 2014; Hung et al. 2017; Han et al. 2017).

109 Because most cellular RNAs exist in close proximity to proteins, we reasoned  
110 that APEX-tagged subcellular proteomes could also provide access to the nearby  
111 RNA content, if proteins and RNA could be crosslinked together *in situ*, immediately  
112 before or after APEX labeling. As our first target organelle, we selected the  
113 mitochondrion because its RNA content--derived from both the mitochondrial  
114 genome and from imported, nuclear-encoded RNAs--has been extensively  
115 characterized by a wide array of complementary methods (Mercer et al. 2011; Alán  
116 et al. 2010; Piechota et al. 2006; Ro et al. 2013), hence providing a “gold-standard”  
117 to which we can compare our results. The mitochondrial matrix was also the first  
118 mammalian compartment mapped by APEX proteomics methodology (Rhee et al.  
119 2013). As a RNA-protein chemical crosslinker, we opted for mild formaldehyde  
120 treatment, which covalently captures most protein-protein and protein-nucleic acid  
121 interactions, and can be achieved with minimal disruption of native interactions in  
122 live cells. It is for these reasons that formaldehyde is used for several RIP (Chris  
123 Gilbert and Svejstrup 2006) technologies for identifying the RNA partners of specific  
124 proteins of interest, including our own “fRIP-Seq” protocol (Hendrickson et al. 2016).

125 Since it was unclear *a priori* whether APEX-catalyzed biotinylation should  
126 precede or follow the formaldehyde crosslinking step, we explored both schemes in  
127 parallel (Figure S1A; see methods). Each protocol, applied to HEK 293T cells  
128 expressing mitochondrially-localized APEX2 (“mito-APEX2”, Figures 1B-C), resulted  
129 in clear enrichment of fifteen mitochondrial-encoded RNAs—relative to the  
130 cytosolic marker *GAPDH*—as gauged by RT-qPCR (average of  $49.3 \pm 3.5$  and  
131  $60.9 \pm 4.1$ -fold enrichment, respectively, Figure S1A). Assuming that fixing cells prior  
132 to biotinylation would better capture transient or weak RNA-protein interactions,  
133 we selected the crosslinking-then-BP protocol for RNA-Seq analysis. While this  
134 confirmed that mitochondrial mRNAs were enriched, a sizeable “shoulder” of  
135 conspicuous off-target RNAs were also unexpectedly enriched (Figure S1B). Thus,  
136 we re-examined our labeling and crosslinking protocols, using a sampling of these  
137 off-target RNA markers (e.g., the abundant nuclear RNA *XIST*, and cytosol-localized

138 RNAs *HOOK2* and *MAN2C1*). This more comprehensive analysis revealed that APEX  
139 labeling followed by crosslinking provides superior specificity (Figure S1C). We  
140 hypothesize that the mild formaldehyde treatment compromises membrane  
141 integrity (Fox et al. 1985), allowing BP radicals to escape to adjoining compartments  
142 when APEX labeling is performed after formaldehyde treatment.

143 We used the optimized APEX followed by crosslinking protocol to map  
144 mitochondrial RNAs in mito-APEX2-expressing HEK 293T cells (Figure 1D, Table 1,  
145 tab 2). Gene-level analysis, comparing RNA counts before and after streptavidin  
146 enrichment, revealed that all 13 mRNAs encoded by the mitochondrial genome were  
147 highly enriched (greater than 3.5 fold) in three independent replicates (Figures 1D  
148 and S1E, Table 1 tab 1). Enrichment was absent in negative controls with H<sub>2</sub>O<sub>2</sub>  
149 omitted (Figure S1F). Read density plots mapped to the mitochondrial genome  
150 demonstrated that most of our captured RNAs correspond to fully-processed  
151 transcripts, including mRNAs, interstitial tRNAs, and the D-loop leader sequence  
152 from which mitochondrial transcription initiates (Figure 1E). Intriguingly, mito-  
153 mRNA read densities appeared to correlate with previous measures of mRNA half-  
154 life (Nagao, Hino-Shigi, and Suzuki 2008). For example, mRNAs encoding MTCO1-3  
155 have longer half-lives, and more reads from APEX-RIP, than mRNAs encoding  
156 MTND1-2.

157

### 158 **APEX-RIP mapping of the nuclear-cytoplasmic RNA distribution**

159 Having established that APEX-RIP is both specific and sensitive in the  
160 mitochondrion, we next turned our attention to a more challenging compartment:  
161 the mammalian nucleus. The nucleus is more complex and has a less defined  
162 transcriptome than the mitochondrial matrix, but previous Fractionation-Seq  
163 datasets, including by ENCODE (Dunham et al. 2012) (Figures S2A–D), again provide  
164 a reference list to which we can compare our results.

165 We generated HEK 293T cells that stably express APEX2 in the nucleus  
166 (APEX-NLS) or in the cytosol (APEX-NES; NES is a nuclear export signal). The  
167 specificity of *in situ* biotinylation by these constructs within each compartment was  
168 confirmed by imaging (Figure 2A). Whole cell lysates prepared from each cell line  
169 also produced distinct “fingerprints” of biotinylated proteins, as assayed by  
170 streptavidin blotting (Figure S1D).

171 We performed APEX-RIP on both APEX-NLS and APEX-NES cells, using the  
172 biotinylation-first/crosslinking-second protocol established above, with an  
173 additional one-minute radical-quenching step in between the APEX and crosslinking  
174 steps (Figure S3A; see *methods*). Encouragingly, “gold standard” nuclear and  
175 cytosolic RNAs (defined from the ENCODE data as the top 1000 RNAs in each  
176 compartment; see Table 2 tab 4) were enriched from the corresponding cell lines as  
177 predicted (Figure 2B *histograms* and Figures S2E–F). Moreover, when directly  
178 comparing the fold-enrichments from each compartment to one another, it was  
179 apparent that APEX-NLS had effectively enriched known nuclear-localized RNAs,  
180 while APEX-NES had enriched known cytosol-localized RNAs (Figure 2B *scatter plot*,  
181 Table 2 tab 3). We calculated for each RNA a “nuclear preference score,” defined as  
182 the minimum geometric distance of each point to the line  $y=x$  (corresponding to the  
183 set of genes which are not preferentially enriched from either compartment).

184 Receiver Operator Characteristic (ROC) analysis of these nuclear preference scores  
185 was used to filter the data and obtain final transcript lists of 5,467 nuclear RNAs and  
186 10,130 cytosolic RNAs from living HEK 293T cells (Table 2 tabs 1 and 2). The false  
187 discovery rates of these two lists are <0.6% and <0.4%, respectively.

188 When plotted by nuclear preference score, the human transcriptome  
189 displayed an overall bimodal distribution, wherein the majority of species were  
190 cytoplasmic, appended by a smaller right-shifted populace of predominantly nuclear  
191 RNAs (Figure 2C, left). As might be predicted (Derrien et al. 2012), many of this latter  
192 group were lncRNAs, which clearly showed preferential nuclear localization (Figure  
193 2C, middle). Most mRNAs appeared to be cytosolic in our data (Figure 2C, right).  
194 Notably, we also observed sizeable populaces of RNAs exhibiting noncanonical  
195 nuclear–cytoplasmic partitioning (Figure 2D). 3323 mRNAs—including *C1orf63*, for  
196 example (Figure 2D)—appeared preferentially nuclear. Many of these species have  
197 been proposed to play a role in dampening gene expression noise (Bahar Halpern et  
198 al. 2015). Conversely, 234 lncRNAs appeared preferentially cytoplasmic; these  
199 include the known cytoplasmic lncRNA *SNHG5*, a modulator of staufen-mediated  
200 decay that influences colorectal tumor growth (Derrien et al. 2012; Damas et al.  
201 2016) (Figure 2D).

202 Our APEX-RIP nuclear and cytosolic RNA lists provide an opportunity for a  
203 head-to-head comparison with the traditional Fractionation-Seq method for  
204 mapping subcellular RNA localization. ROC analysis of the ENCODE Fractionation-  
205 Seq data yielded a list of 3,056 RNAs enriched by nuclear fractionation (Table 2 tab  
206 5). Of these RNAs, 81% (2469) were also enriched in our APEX-RIP nuclear dataset,  
207 implying general agreement between the two technologies (Figure 2E). Notably,  
208 APEX-RIP also enriched nearly 3000 additional transcripts. These may be nuclear-  
209 localized RNAs that were opaque to the ENCODE protocol, or contaminants enriched  
210 by APEX-RIP. To address this possibility, we examined each dataset for conspicuous  
211 non-nuclear contaminants: RNAs that are known to be localized at the Endoplasmic  
212 Reticulum (Jan, Williams, and Weissman 2014). Satisfyingly, the APEX-RIP nuclear  
213 dataset, though larger, contained fewer ER contaminants than did the analogous  
214 fractionation-based dataset, implying that APEX-RIP produces higher specificity  
215 than Fractionation-Seq (Figure 2F, left).

216 To compare the coverage/sensitivity of each method (sometimes termed  
217 recall), we examined the enrichment in each dataset of lncRNAs, which are thought  
218 to be predominantly nuclear (Derrien et al. 2012). We assembled a list of 827  
219 annotated lncRNAs (GENCODE hg19) with average FPKM pre-enrichment greater  
220 than 1.0 (Table 2 tab 7). Of these lncRNAs, 71.7 % are enriched in our APEX-RIP-  
221 derived nuclear dataset, while nuclear Fractionation-Seq from the same cell line  
222 enriched only 43.4 % (Figure 2E, right). We conclude that APEX-RIP can be superior  
223 to Fractionation-Seq in terms of *both* specificity and coverage, for analysis of  
224 endogenous RNA subcellular localization.

225

### 226 **Enrichment of RNAs proximal to the ER membrane**

227 The above efforts establish that APEX-RIP can enrich RNAs in membrane-enclosed  
228 cellular compartments. We next sought to address whether the technique could  
229 successfully capture the transcriptomes of “open” subcellular regions. Previous

230 proteomic work has shown that APEX tagging exhibits sufficient spatial specificity  
231 for such open compartments, since this technology has produced highly specific  
232 proteomic maps of, for example, the mammalian neuronal synaptic cleft(Loh et al.  
233 2016), outer mitochondrial membrane(Hung et al. 2017), mitochondrial  
234 nucleoid(Han et al. 2017), and G-protein coupled receptor interaction  
235 network(Lobingier et al. 2017; Paek et al. 2017). We were unsure, however, if the  
236 additional formaldehyde crosslinking step would preserve or blur the estimated <10  
237 nanometer spatial resolution of APEX labeling(Rhee et al. 2013).

238 As a test case for the generality of APEX-RIP at such open compartments, we  
239 selected the Endoplasmic Reticulum (ER). The ER is an appealing target for several  
240 reasons. First, it is host to a known set of characteristic RNAs that we can use as  
241 positive controls—the so-called “secretome”—which comprises mRNAs encoding  
242 secreted, glycosylated, and/or transmembrane proteins, that are translated by  
243 ribosomes on the rough ER. Second, the ER provides the opportunity to compare the  
244 efficacy of APEX-RIP to alternative approaches, since RNAs in this subcellular locale  
245 have been previously characterized both by Fractionation-Seq, and by a newer  
246 methodology termed proximity-dependent ribosome profiling(Jan, Williams, and  
247 Weissman 2014; Williams, Jan, and Weissman 2014). This latter technique maps  
248 active protein translation at the ER membrane by combining ribosome  
249 profiling(Ingolia et al. 2009) with proximity-restricted sequence-specific  
250 biotinylation, using an ER-targeted biotin ligase and ribosomes that are tagged with  
251 the peptide substrate (AviTag) of that ligase.

252 Since it was initially unclear which face of the ER membrane (cytosolic or  
253 luminal) would be most amenable to the APEX-RIP method, we generated fusion  
254 constructs that localized the peroxidase catalytic center to each (Figures 3A–B).  
255 ERM-APEX2 targets APEX2 to the ER cytosolic surface via a 27-amino acid fragment  
256 derived from the native ER membrane (ERM) protein cytochrome P450 C1. HRP-  
257 KDEL targets horseradish peroxidase (HRP) to the ER lumen via an N-terminal ER-  
258 targeting signal and a C-terminal KDEL ER-retention motif(Martell et al. 2012). We  
259 have shown that HRP catalyzes the same proximity-dependent biotinylation  
260 chemistry as APEX2(Loh et al. 2016), but has higher specific activity than APEX2 in  
261 the ER lumen(Lam et al. 2014). We generated HEK 293T cells stably expressing  
262 ERM-APEX2 and HRP-KDEL, and confirmed by microscopy and streptavidin blotting  
263 that each produced the expected labeling patterns (Figures 3C and D). Next, we  
264 compared the efficacy of each construct for target RNA isolation, using the  
265 biotinylation-first/crosslinking-second APEX-RIP protocol, and analyzing our  
266 results via RT-qPCR analysis of established secretome and non-secretome mRNAs<sup>24</sup>.  
267 Parallel experiments with APEX2-NES cells served as negative controls (Figure 3E).

268 Intriguingly, while APEX-RIP from HRP-KDEL cells efficiently enriched target  
269 secretome mRNAs relative to non-target controls (average fold enrichment = 19.5,  
270 paired t-test p-value = 0.00009), parallel experiments in ERM-APEX2 cells exhibited  
271 only modest, qualitative enrichment of target species (average fold enrichment =  
272 1.49, paired t-test p-value = 0.0515). Indeed, results from ERM-APEX2 cells were  
273 nearly indistinguishable from those acquired from APEX2-NES control cells (paired  
274 t-test p-value = 0.830, Figure 3E, right). This is surprising, since proteomic

275 experiments in HEK 293T cells expressing the identical ERM-APEX2 construct  
276 yielded highly specific enrichment of ER-localized proteins (Hung et al. 2017).  
277 Our data strongly imply that APEX-RIP does *not* have the same spatial  
278 specificity as peroxidase-catalyzed proteomic labeling, and may be limited by  
279 perturbations induced by formaldehyde crosslinking. However, we were highly  
280 encouraged by the data obtained with the HRP-KDEL construct. We hypothesize that  
281 APEX-RIP with this construct is effective because formaldehyde crosslinking  
282 physically couples RNAs on the cytosolic face of the ER to protein complexes that are  
283 biotinylated within the ER lumen, thereby allowing target RNAs to be enriched by  
284 streptavidin (Figure 3A). Furthermore, we observed that the target specificity of this  
285 approach could be greatly improved by addition of a one-minute radical-quenching  
286 step in between the biotinylation and crosslinking steps in our protocol (Figure  
287 S3A). We surmise that this additional step prevents residual peroxidase-generated  
288 radicals from leaking into adjoining compartments when the integrity of the ER  
289 membrane is compromised during formaldehyde treatment.

290 Using this improved protocol, we performed APEX-RIP on HRP-KDEL cells  
291 (Table 3 tab 2). Gene-level analysis, comparing RNA counts before and after  
292 streptavidin pulldown, revealed a distinct population of substantially enriched RNAs  
293 (Figures 3F and S3B). Encouragingly, the majority (63.4%) of secretome mRNAs  
294 (defined by ER proximal RNAs (Jan, Williams, and Weissman 2014) and Phobius  
295 predicted mRNAs with exclusion of nuclear encoded mitochondrial mRNAs, see  
296 *methods*) resided in this set, while most (97.1%) mRNAs in a test set of known non-  
297 secreted genes were not enriched, thus demonstrating the ability of APEX-RIP to  
298 isolate ER-associated transcripts from the larger population of cellular RNAs (Figure  
299 3F). Using histogram and ROC analysis, we determined the optimal log<sub>2</sub> FKPM  
300 significance threshold cutoff for each experimental replicate (Figure S3C; see  
301 *methods*), obtaining a final list of 2970 ERM-associated RNAs that were  
302 independently enriched in multiple experiments (Table 3 tab 1). This dataset  
303 exhibited 94% specificity, based on previous secretory annotation as defined by  
304 GOCC, SignalP, TMHMM, or Phobius (Ashburner et al. 2000; Petersen et al. 2011;  
305 Krogh et al. 2001; Käll, Krogh, and Sonnhammer 2004). Figure 3H shows that we  
306 also de-enriched mRNAs lacking such signals. Coverage was likewise exceptional  
307 (97%), as gauged by the recall of 71 literature-curated well-established ER resident  
308 proteins' mRNAs (Table 3 tab 5; Figure 3I, see *methods*).

309 We next compared the ERM APEX-RIP dataset to analogous results obtained  
310 by subcellular biochemical fractionation (Reid and Nicchitta 2012), and by  
311 proximity-dependent ribosome profiling (Jan, Williams, and Weissman 2014) (Table  
312 3, tabs 3 and 4, respectively). Encouragingly, APEX-RIP captures the majority of  
313 RNAs enriched by each of these alternative techniques (70% and 93%, respectively,  
314 Figure 3J), implying broad agreement between the different methodologies. To  
315 examine this further, we quantified the specificity and coverage of each approach, as  
316 above (see *methods*). Specificity analysis demonstrated that APEX-RIP and ribosome  
317 profiling exhibited similarly high specificity (94% and 98%, respectively). However,  
318 Fractionation-Seq was substantially noisier, such that only 90% of enriched mRNAs  
319 bore a secretory annotation (Figure 3H); the remaining 10% comprised sizeable  
320 populations of conspicuous contaminants (Figure S3E). The coverage of ER-localized

321 mRNAs retrieved by APEX-RIP (97%) was also considerably higher than those  
322 retrieved by both Fractionation-Seq and ribosome profiling (73% and 77%,  
323 respectively, [Figure 3J](#)). We attribute the enhanced coverage of APEX-RIP to its  
324 higher sensitivity, since this method appears better suited for capturing RNAs with  
325 lower abundances than do the alternative approaches ([Figure S3 F-G](#)). Such higher  
326 sensitivity may also explain why the set of RNAs enriched by APEX-RIP is so much  
327 larger than those obtained by fractionation and ribosome-profiling ([Figure 3H](#)).  
328 Excitingly, this further underscores the ability of APEX-RIP to recover RNAs that are  
329 opaque to other methods. While the vast majority (88.7%) of our enriched RNAs are  
330 mRNAs, we also enrich hundreds of noncoding RNA species—including antisense  
331 RNAs and lincRNAs ([Figure 3G](#)). These RNAs are not translated, and thus cannot be  
332 detected by ribosome profiling, and tend to be lowly expressed, making them  
333 difficult targets for either ribosome profiling or Fractionation-Seq.

334 In summary, APEX-RIP is superior to existing methods for mapping  
335 endogenous RNAs proximal to the ER membrane, and may be extensible to other  
336 membrane-abutting subcellular regions as well.

337

### 338 **Hypotheses from ER and nuclear APEX-RIP datasets**

339 We wondered if the highly specific and comprehensive RNA subcellular localization  
340 datasets produced by APEX-RIP could be mined for new biological hypotheses. We  
341 first observed that, of the 2635 mRNAs in our ERM dataset, 141 code for  
342 mitochondrial proteins. It is thought that that the bulk of the nuclear-encoded  
343 mitochondrial proteome is translated within the bulk cytosol, or in proximity to  
344 mitochondria themselves(Lesnik, Golani-Armon, and Arava 2015), raising the  
345 possibility that the translation or subsequent processing of these 141 protein  
346 products require machinery localized to the ER. Additionally, these mRNAs may be  
347 translated at mitochondria-ER contact sites, some of which have been observed to  
348 contain ribosomes(Csordás et al. 2006). To gain initial insight into these unusual  
349 RNAs, we analyzed these 141 genes to see whether, relative to total pool of mRNAs  
350 encoding mitochondrially-localized proteins, they were enriched in particular  
351 properties ([Table 4 tab 1](#)). Intriguingly, 57.1% of these mRNAs code for  
352 transmembrane proteins (as predicted by TMHMM), compared to only 20.4% for all  
353 mitochondrial protein mRNAs ([Figure 4A](#)). Mitochondrial subcompartment analysis  
354 showed that the ER-proximal population is enriched for proteins destined for the  
355 inner mitochondrial membrane, and is depleted for resident matrix proteins,  
356 compared to the total mitochondrial proteome ([Figure 4B](#)). Interestingly, proximity-  
357 dependent ribosome profiling by Williams et al. in yeast using biotin ligase targeted  
358 to the outer mitochondrial membrane(Williams, Jan, and Weissman 2014) also  
359 showed enrichment of mRNAs encoding proteins destined for the inner  
360 mitochondrial membrane. Perhaps a subset of inner mitochondrial membrane-  
361 destined proteins are locally translated at mitochondria-ER contact sites.

362 Next, we tested whether new insights could be gained by examining RNAs  
363 that APEX-RIP had enriched from more than one subcellular compartment. Because  
364 the ER lumen is contiguous with that of the nuclear envelope, we hypothesized that  
365 the HRP-KDEL APEX-RIP experiment, in addition to enriching RNAs proximal to the  
366 ER, might also enrich RNAs proximal to the nuclear membrane. This region within



367 the nucleus, termed the nuclear lamina, is widely thought to play a critical role in  
368 gene repression (Kind and van Steensel 2010), and in shaping the global three-  
369 dimensional architecture of chromatin (C.-K. Chen et al. 2016). However, no  
370 exclusively laminar-resident RNAs have yet been identified. We hypothesized that  
371 we might identify such long-sought lamina RNAs by intersecting our APEX-RIP  
372 nuclear and ERM RNA lists (Figure 4C). Encouragingly, we observed 673 such RNAs  
373 in the intersection list, 34 of which are long noncoding RNAs (Figure 4D; Table 4 tab  
374 2). This small list is a compelling starting point for exploration of regulatory RNAs  
375 that may reside in the nuclear lamina.

376

## 377 Discussion

378 Methods for mapping RNA subcellular localization are constrained by the limits of  
379 their spatiotemporal precision, the diversity of RNA species that they can  
380 simultaneously analyze, their generality across cell types and compartments, and  
381 their ease of use. We believe that APEX-RIP is superior to existing imaging- and  
382 sequencing-based techniques with regard to many of these factors.

383 Compared to imaging-based technologies, APEX-RIP offers superior target  
384 throughput, ease of use, and temporal control. For example, although modern  
385 variants of FISH can achieve extremely high spatial precision—even enabling the  
386 visualization of individual RNA molecules (Batish, Raj, and Tyagi 2011)—this  
387 technique requires the synthesis and testing of customized fluorescent probes for  
388 each transcript under enquiry, a cumbersome process that limits throughput (Cabili  
389 et al. 2015). A highly multiplexed FISH variant, merFISH, substantially boosts  
390 throughput—enabling thousands of transcripts to be simultaneously visualized—  
391 but requires complex protocols for probe set design and imaging (K. H. Chen et al.  
392 2015). An alternate approach, FISSEQ, achieves similar target depth without the  
393 need for gene-specific probes, but instead relies on customized instrumentation and  
394 a rococo process of *in situ* sequencing and imaging (Lee et al. 2014). Notably, without  
395 incorporating additional stains or markers, these imaging-based approaches  
396 provide little information regarding the local environment (*i.e.*, proximal cellular  
397 compartments or features) near each RNA target. Furthermore, these techniques  
398 fundamentally lack temporal precision: each requires extensively fixing and  
399 permeabilizing cells prior to data collection, during which time diffusion or the loss  
400 of cellular integrity can perturb endogenous RNA localization. This latter issue can  
401 be circumvented through a variety of live-cell imaging technologies, but these  
402 require the implementation of customized reagents that limit throughput, and may  
403 even distort the localization of the RNA targets under enquiry (Paige, Wu, and Jaffrey  
404 2011; Hocine et al. 2013; Nelles et al. 2016). By contrast, APEX-RIP is not  
405 encumbered by any of these constraints. It does not require the development of  
406 target-specific expression constructs or probes; nor does it rely on specialized  
407 instrumentation. The ensemble of RNA targets analyzed (and, for that matter, the  
408 array of RNA classes analyzed) is theoretically limited only by the library synthesis  
409 and sequencing protocols employed. Moreover, since APEX-RIP captures only RNAs  
410 proximal to a specific subcellular compartment, and does so during a one-minute  
411 reaction, the technique offers both greater information content and higher temporal  
412 resolution than do its imaging-based alternatives.

413 Compared to fractionation-based technologies, APEX-RIP offers superior  
414 accuracy, ease of use, and general versatility. As illustrated in the nucleus and ER,  
415 our technique outperforms conventional Fractionation-Seq with regard to both  
416 target specificity and recall, apparently circumventing the dual issues of target loss  
417 and off-target contamination that can plague such approaches (Figures 2E-F). We  
418 ascribe this performance boost to two principal factors. First, the high  
419 spatiotemporal precision afforded by *in situ* biotinylation (Rhee et al. 2013) allows  
420 us to efficiently isolate target material from contaminants that might be difficult to  
421 remove by classical fractionation, thereby improving specificity. Second, covalently  
422 coupling target RNAs to affinity-tagged proteins allows us to recover low-abundance  
423 or weakly affiliated transcripts that might otherwise be lost during biochemical  
424 enrichment, thereby improving target recall. Perhaps more importantly, however,  
425 we have achieved these results in a variety of subcellular compartments using a  
426 common protocol, thus obviating the need to develop customized purification  
427 schemes for each compartment. This generality should enable APEX-RIP to access  
428 “unpurifiable” subcellular compartments for which such purification schemes would  
429 be impossible. While a related technology, proximity-dependent ribosome profiling,  
430 exhibits similar versatility within diverse subcellular milieus (Jan, Williams, and  
431 Weissman 2014), this approach is limited to mRNAs actively undergoing translation.  
432 It also requires biotin starvation prior to tagging, which is toxic to mammalian cells.  
433 As we have demonstrated, APEX-RIP can map diverse classes of noncoding RNA and  
434 quiescent mRNA (Figure 3G), and toxic protocols starving cells of essential nutrients  
435 for hours are not required.

436 The APEX-RIP methodology does have notable limitations. Cells to be  
437 analyzed must be transfected with a recombinant construct, in contrast to FISH and  
438 Fractionation-Seq, which can be performed on native tissues. APEX-RIP also gives  
439 poor spatial specificity in membrane-free subcellular regions.

440 The APEX peroxidase used here has also previously been used to generate  
441 contrast for electron microscopy in fixed cells (Martell et al. 2012; Lam et al. 2014),  
442 and for spatially-resolved proteomic mapping in living cells (Rhee et al. 2013; Hung  
443 et al. 2014; Loh et al. 2016; Han et al. 2017; Hung et al. 2017; Mick et al. 2015). This  
444 study extends APEX to a new class of applications and to a new biopolymer. In  
445 principle, it should be possible to utilize a single APEX-expressing cell line to  
446 characterize a target subcellular compartment by electron microscopic, proteomic,  
447 and transcriptomic means. Related methods for proteomic mapping, such as  
448 BioID (Roux et al. 2012), lack this versatility, because the underlying chemistry is not  
449 as flexible as the one-electron oxidation reaction catalyzed by APEX.

450 We anticipate that the initial subcellular transcriptomic map presented in  
451 this work—probing the mitochondrial matrix, cytosol, nucleus, and ER membrane of  
452 HEK293T cells—will serve as valuable resources for cell biologists. Analysis of these  
453 data has already yielded potential insight into nuclear-retained mRNAs, cytosolic  
454 lncRNAs, putative lamina-localized RNAs, and genes that may be translated locally at  
455 mitochondria-endoplasmic reticulum junctions. Applying APEX-RIP at other  
456 subcellular compartments will further expand the depth and breadth of this map.  
457 Furthermore, given the high temporal resolution of APEX-RIP, we imagine that our  
458 technology might enable profiling of subcellular RNA pools in response to acute

459 stimuli or drugs, or throughout stages of the cell cycle and development.  
460 Collectively, such studies would yield an understanding into the biology of RNA  
461 subcellular localization at unprecedented scale.

462

### 463 **Significance**

464 RNA subcellular localization is a critical factor that influences a wide array of  
465 biological processes, ranging from *Drosophila* embryogenesis to mammalian  
466 neuronal signaling. However, while this spatial layer of transcriptome regulation has  
467 been characterized in a handful of contexts, a broader understanding of its overall  
468 extent, the factors governing its establishment, and its impact on biological function,  
469 remain inchoate. The limitations hindering this understanding have been largely  
470 technical, since conventional methods—such as fluorescence *in situ* hybridization  
471 (FISH) and Fractionation-Sequencing (“Frac-Seq”)—depend upon specialized  
472 reagents and protocols that can limit throughput and general applicability. To  
473 address this fundamental need, we have developed a new strategy—APEX-RIP—  
474 which uses a simple toolkit and workflow to map the transcriptomes of discrete  
475 subcellular compartments at high depth and spatiotemporal resolution. APEX-RIP  
476 utilizes the engineered ascorbate peroxidase APEX to biotinylate proteins within a  
477 target subcellular compartment in live cells; these affinity-tagged proteins are then  
478 chemically crosslinked *in situ* to nearby RNAs. When applied to a variety of  
479 membrane-enclosed and membrane-adjacent compartments, the APEX-RIP strategy  
480 exhibited higher target specificity and coverage than do conventional fractionation-  
481 sequencing-based approaches, at a depth far exceeding those attainable by imaging-  
482 based methods. Furthermore, APEX-RIP can be applied to compartments that are  
483 recalcitrant to conventional biochemical purification. Given the superior precision,  
484 flexibility, and ease of this approach, we anticipate that APEX-RIP will provide a  
485 powerful tool for dissecting RNA subcellular localization in a broad range of  
486 biological contexts.

487

### 488 **Author contributions**

489 Conceptualization, PK, DMS, AYT; Methodology, PK, DMS, AYT; Validation, PK and  
490 DMS; Formal Analysis, PK and WM; Investigation, PK and DMS; Data Curation, PK;  
491 Writing – Original Draft, PK, DMS, and AYT; Writing – Review & Editing, PK, DMS,  
492 JLR, and AYT; Visualization, PK, DMS, and AYT; Supervision, JLR and AYT; Project  
493 Administration, AYT; Funding Acquisition, JLR and AYT.

494

### 495 **Acknowledgements**

496 We thank members of the Ting laboratory, especially Jeffrey Martell for valuable  
497 experimental advice and Ozan Aygun for the curated ER protein list. We thank the  
498 Rinn laboratory, especially Chinmay Shukla, for valuable computational advice.  
499 Funding was provided by the NIH (R01-CA186568 to A.Y.T. and U01 DA040612 to  
500 J.L.R.) and Stanford (to A.Y.T).

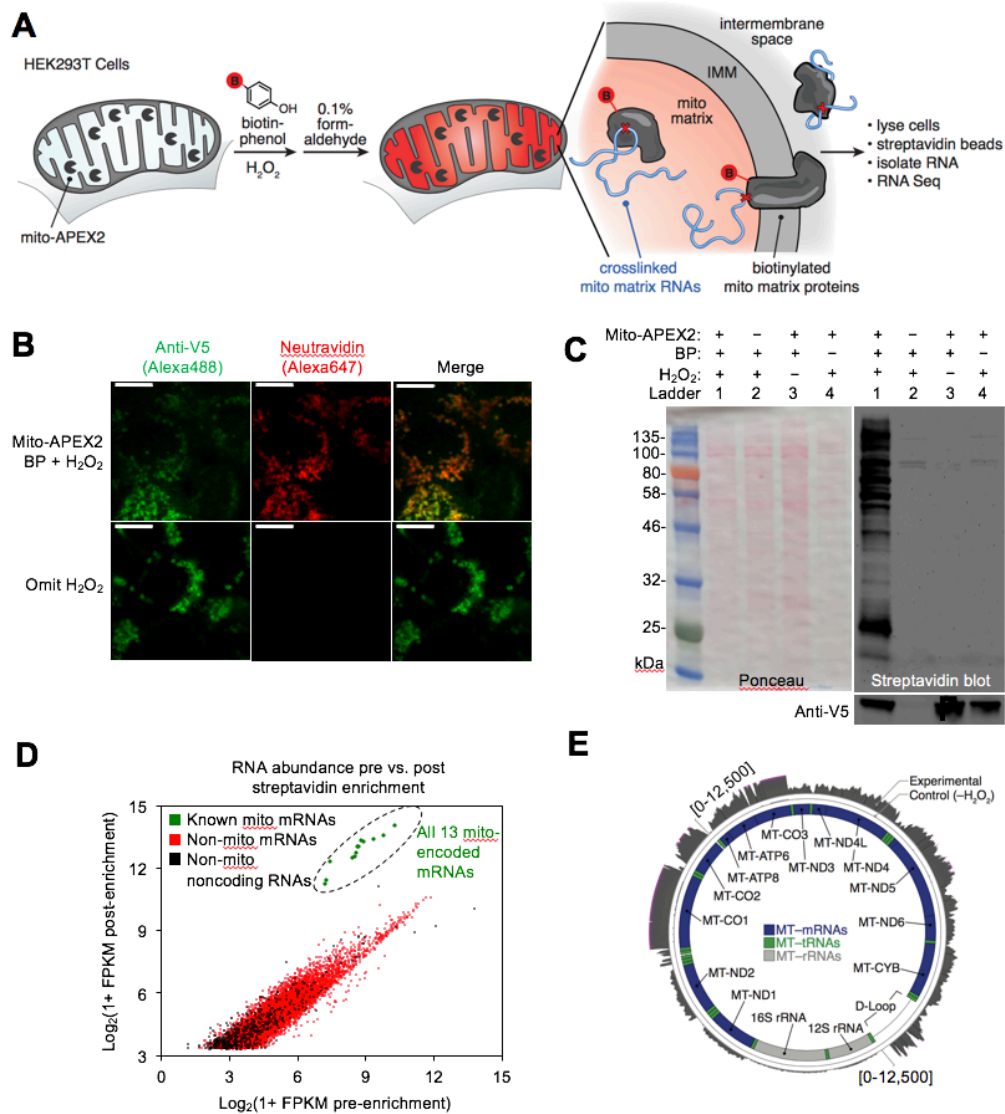

501  
502 **Figure 1. APEX-RIP in mitochondria.** (A) Overview of the APEX-RIP workflow. Cells  
503 expressing APEX2 (grey 'pacmen') targeted to the compartment of interest (here, the  
504 mitochondrial matrix.) are incubated with the APEX substrate biotin-phenol (BP; red B:  
505 biotin). A one-minute pulse of  $H_2O_2$  initiates biotinylation of proximal endogenous  
506 proteins (Rhee et al. 2013), which are then covalently crosslinked to nearby RNAs by 0.1%  
507 formaldehyde. Following cell lysis, biotinylated species are enriched by streptavidin  
508 pulldown, and coeluting RNAs are analyzed by RT-qPCR or RNA-Seq. IMM: inner  
509 mitochondrial membrane. (B) Imaging APEX2 biotinylation *in situ*. HEK 293T cells  
510 expressing V5-tagged mito-APEX2 were biotinylated and fixed as described in (A) and  
511 stained as indicated. The bottom row is a negative control in which  $H_2O_2$  treatment was  
512 omitted. Scale bars, 10  $\mu$ m. (C) Streptavidin blot analysis of whole cell lysates prepared as  
513 described in (A). *In situ* biotinylation (lane 1) is ablated in the absence of the APEX2 protein,  
514  $H_2O_2$ , or BP. Anti-V5 blot detects expression of mito-APEX2. (D-E) mito-APEX-RIP efficiently  
515 recovers the mitochondrial transcriptome. (D) Gene-level RNA-Seq analysis of mito-APEX-  
516 RIP enrichment for RNAs longer than 200nt. Data from one biological replicate are shown.  
517 (E) Nucleotide-level RNA-Seq analysis of mito-APEX-RIP, mapped to the human  
518 mitochondrial genome (innermost circle). Outermost circle: reads from the full APEX-RIP

519 protocol; middle circle: reads from the negative control. Note the enrichment of several  
520 mitochondrially-encoded tRNAs and the D-loop leader transcript. Ribosomal RNAs were  
521 removed during library preparation (*see methods*). See also: [Figure S1](#).

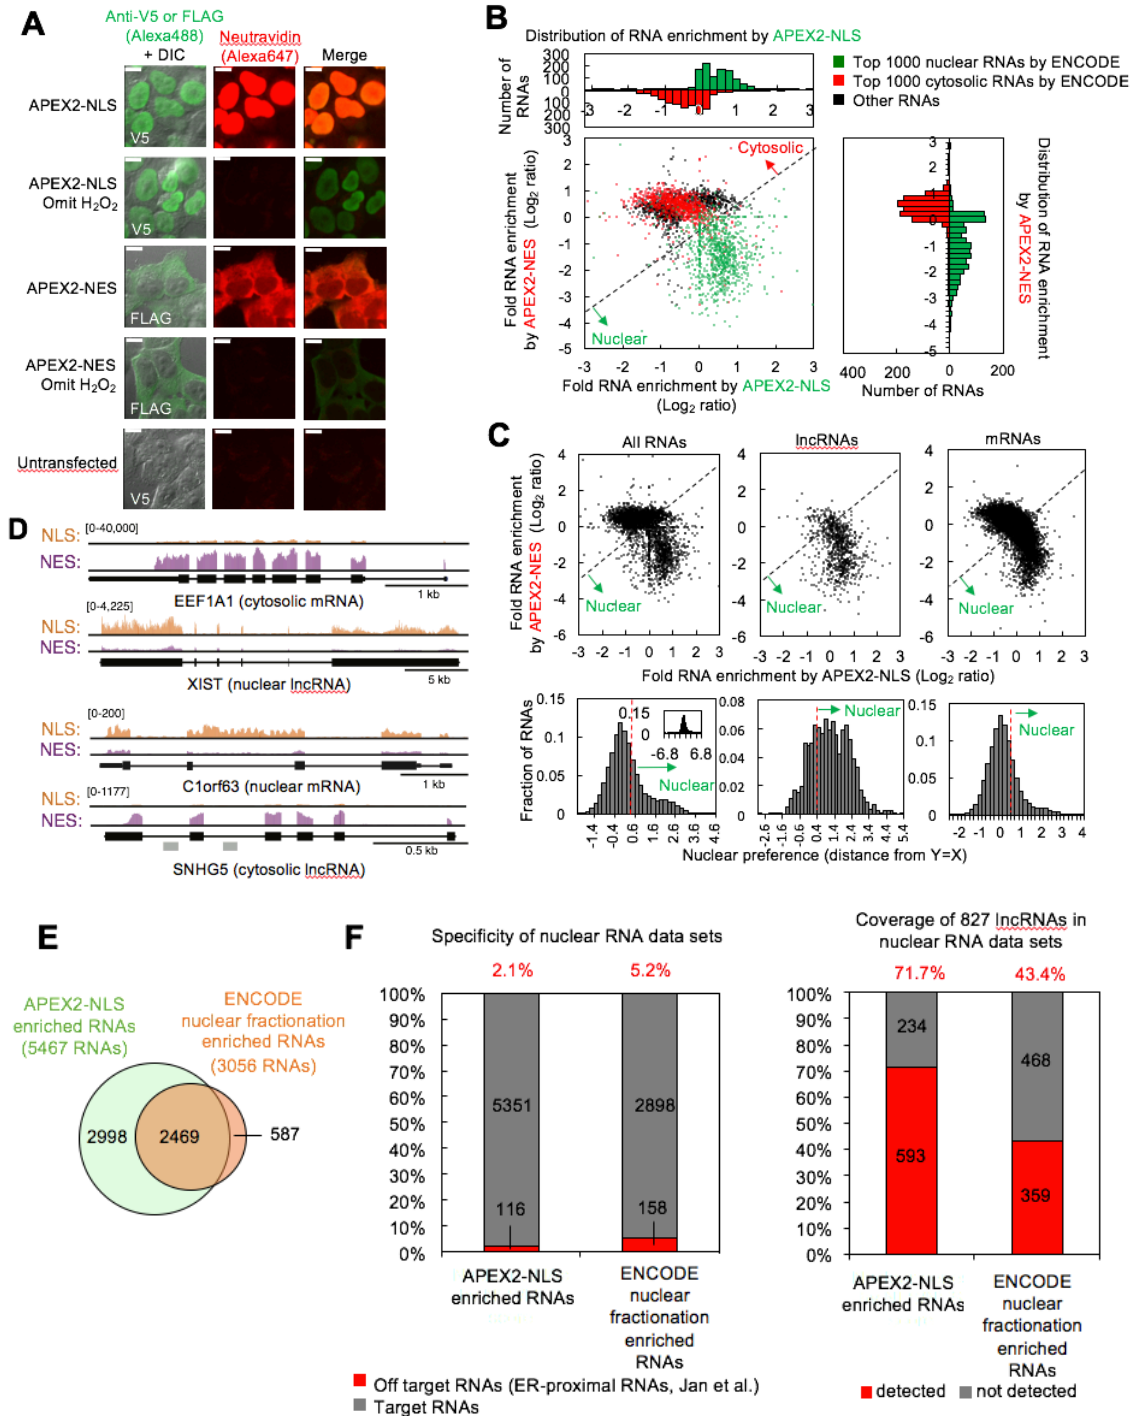

522

523

524

525

526 **Figure 2. APEX-RIP mapping of the nuclear-cytoplasmic RNA distribution. (A)**

527 Fluorescence imaging of nuclear and cytosol-targeted APEX2 fusion constructs. HEK 293T

528 cells expressing the indicated constructs (“NLS,” nuclear localization signal; “NES,” nuclear

529 export signal) were labeled with biotin-phenol, crosslinked and stained as indicated. DIC,

530 Differential Interference Contrast. Scale bars, 10  $\mu$ m. (B) Combined analysis of APEX2-NLS

531 and NES experiments distinguishes nuclear and cytoplasmically localized RNAs. Fold

enrichment values were calculated relative to matched input samples; the median values of

532 three replicates are shown (see *methods*). The 1000 RNAs with the highest predicted  
533 nuclear and cytosolic localization by ENCODE(Dunham et al. 2012) are colored green and  
534 red, respectively (see *methods*). Histogram plots, summarizing the separation of these RNA  
535 standards by each APEX2 construct, are projected along the axes of the scatter plot and use  
536 the same scales. The black dotted line marks the cutoff between nuclear and cytosolic RNAs.  
537 (C) APEX-RIP captures the established nuclear-cytoplasmic distribution of mRNAs and  
538 lncRNAs. *Top*: APEX2-NLS versus APEX2-NES scatter plots, as in (B), for all RNAs (*left*),  
539 lncRNAs (*middle*), and mRNAs (*right*). Data are the medians of three replicates. Dotted lines  
540 mark the cutoff between nuclear and cytosolic RNAs, as in (B). *Bottom*: histogram plots of  
541 nuclear preference scores (see *methods*) for each class of RNA. Dotted red lines: the ROC-  
542 derived significance threshold (see *methods*). Inset: the complete distribution. (D) Read  
543 density plots of RNAs with stereotypical and atypical localization. For each gene, a common  
544 y-scale is used for all read tracks. SnoRNAs encoded in the *SNHG5* gene body are indicated  
545 as gray rectangles. (E) Venn diagram comparing APEX-RIP and ENCODE nuclear RNA  
546 datasets(Dunham et al. 2012). (F) Nuclear APEX-RIP is more specific and sensitive than is  
547 biochemical fractionation. *Left*: Specificity of the APEX-RIP and ENCODE nuclear RNA  
548 datasets(Dunham et al. 2012). Off-target RNAs were defined actively translated ER-  
549 proximal mRNAs (Jan, Williams, and Weissman 2014). *Right*: Recall of nuclear standard  
550 RNAs, defined as a set of 827 lncRNAs annotated by GENCODE hg19 with average pre-  
551 enrichment FPKM  $\geq 1.0$ . See also: [Figure S2](#).

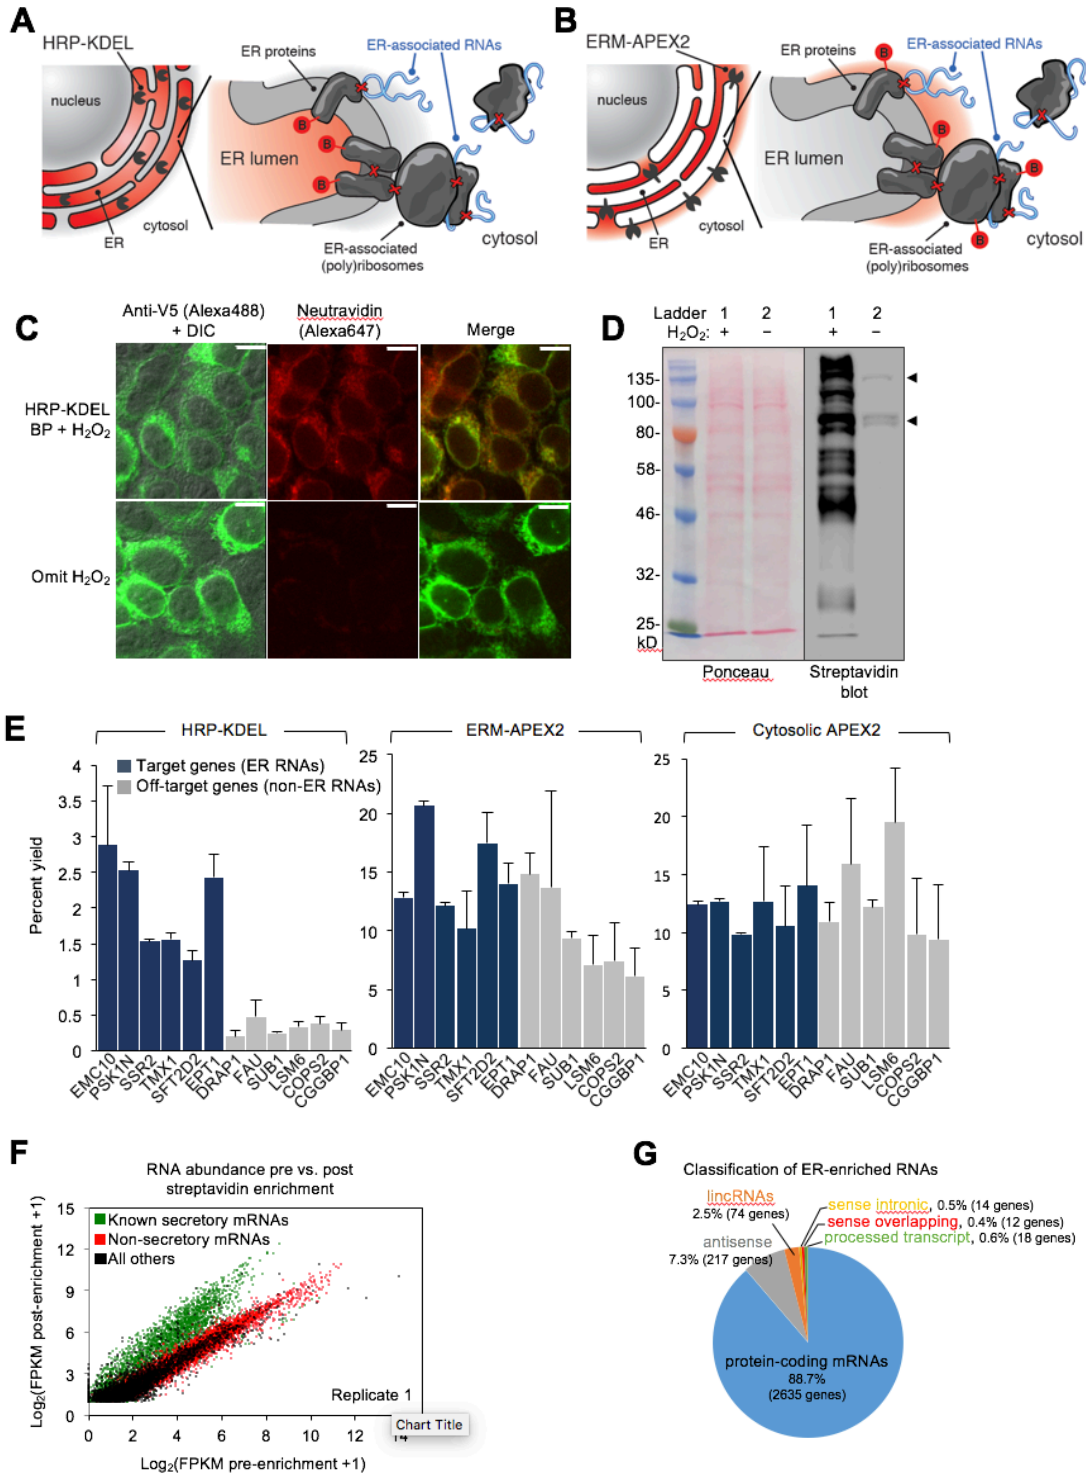

552

553



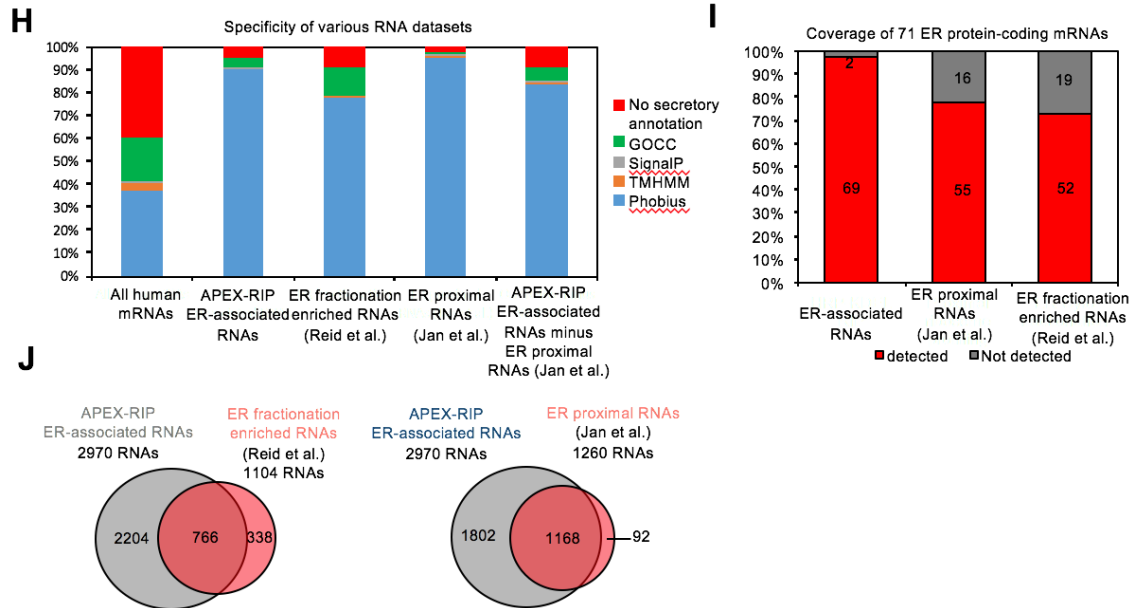

554  
555 **Figure 3. APEX-RIP maps RNAs proximal to the Endoplasmic Reticulum. (A–B)**  
556 Schematics summarizing alternate ER-targeting strategies. (A) HRP, targeted to the ER with  
557 a KDEL sequence, biotinylates proteins within the ER lumen. Red B: biotin. Red Xs: chemical  
558 crosslinks induced by 0.1% Formaldehyde treatment. (B) APEX2, displayed on the ER  
559 membrane (ERM) by fusing it to the transmembrane segment of rabbit P450 C1, faces the  
560 cytosol. (C) Imaging HRP-KDEL-catalyzed biotinylation. HEK293T cells stably expressing  
561 HRP-KDEL were labeled with BP, fixed and imaged as in Figure 1B. DIC, Differential  
562 Interference Contrast. Scale bars, 10  $\mu$ m. (D) Streptavidin blot detection of resident ER  
563 proteins biotinylated by HRP-KDEL, as in Figure 1C. Arrowheads denote endogenously  
564 biotinylated proteins (Chapman-Smith and Cronan 1999). (E) RT-qPCR analysis, comparing  
565 specificities of the labeling schemes shown in (A–B). Target and off-target genes were  
566 selected using previously-reported fold enrichments at the ER membrane (Jan, Williams,  
567 and Weissman 2014). Data are the mean of three replicates,  $\pm$  one standard deviation. (F)  
568 Scatter plot showing RNA abundance before and after streptavidin enrichment. Data shown  
569 are for one replicate. Additional replicates in Figure S3B. (G) Classification of APEX-RIP  
570 enriched, ER-associated RNAs. Collectively, non-coding RNAs constitute 11.3% of enriched  
571 genes (335 of 2970 RNAs). (H) Specificity analysis for protein-coding mRNAs in our ER-  
572 associated RNA list. 95% of the 2635 APEX-RIP ER-enriched mRNAs exhibit some form of  
573 secretory annotation (as predicted by Phobius, TMHMM, SignalP, or GOCC, *see methods*),  
574 whereas only 60.3% of all human mRNAs are similarly classified (*left*). RNAs in our dataset  
575 that were not enriched by ribosome profiling (1802 RNAs) were also predominantly  
576 secretory (90.9%). (I) Target recall of ER APEX-RIP exceeds those of proximity-restricted  
577 ribosome profiling (Jan, Williams, and Weissman 2014) and biochemical fractionation (Reid  
578 and Nicchitta 2012). See also: Table S5. (J) The gene set enriched by ER APEX-RIP largely  
579 recapitulates those enriched by alternative methods. See also: Figure S3.

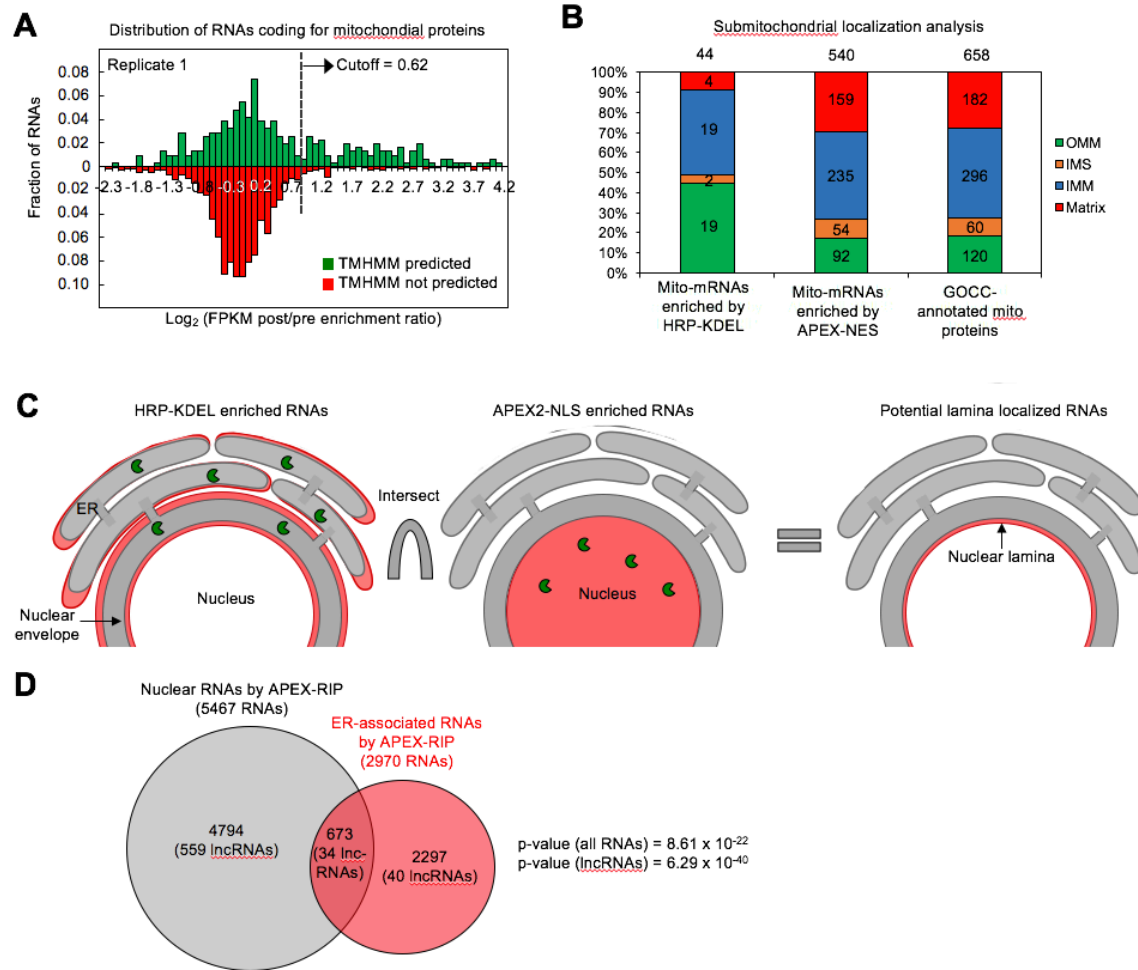

580  
 581 **Figure 4. APEX-RIP reveals RNAs with potentially novel localization.** (A) Many  
 582 mitochondrial transmembrane proteins appear to be translated at the ER. mRNAs encoding  
 583 mitochondrial proteins defined by GOCC and MitoCarta 1.0 (Pagliarini et al. 2008; Ashburner  
 584 et al. 2000), with predicted transmembrane helices (predicted by TMHMM (Krogh et al.  
 585 2001); green distribution) are preferentially enriched by HRP-KDEL APEX-RIP, relative to  
 586 mitochondrial mRNAs lacking transmembrane domains (red distribution) (B) Predicted  
 587 localization of mitochondrial proteins encoded by mRNAs that were enriched in ER- and  
 588 bulk cytosol-APEX-RIP experiments (left and middle, respectively), and of all GOCC-  
 589 annotated mitochondrial proteins. OMM: Outer mitochondrial membrane. IMS:  
 590 Intermembrane space. IMM: Inner mitochondrial membrane. (C) Computational scheme for  
 591 identifying putative lamina-associated RNAs. Since HRP-KDEL-enriched RNAs (left)  
 592 comprise both ER- and lamina-associated RNAs, candidate nuclear lamina-localized RNAs,  
 593 were identified as the intersection (right) of RNAs enriched by both APEX2-NLS (middle)  
 594 and HRP-KDEL. Red: enriched RNAs; green pacmen: is APEX2 or HRP peroxidases. (D) Venn  
 595 diagram identifying putative lamina-associated RNAs, defined as the overlap between HRP-  
 596 KDEL- and APEX2-NLS-enriched RNAs. See also: Table 4, tab 2. The significance of overlap  
 597 between ER-associated RNAs and nuclear-enriched RNAs by APEX-RIP is measured by  
 598 hypergeometric test using all type of RNAs or only lncRNAs as population, respectively.

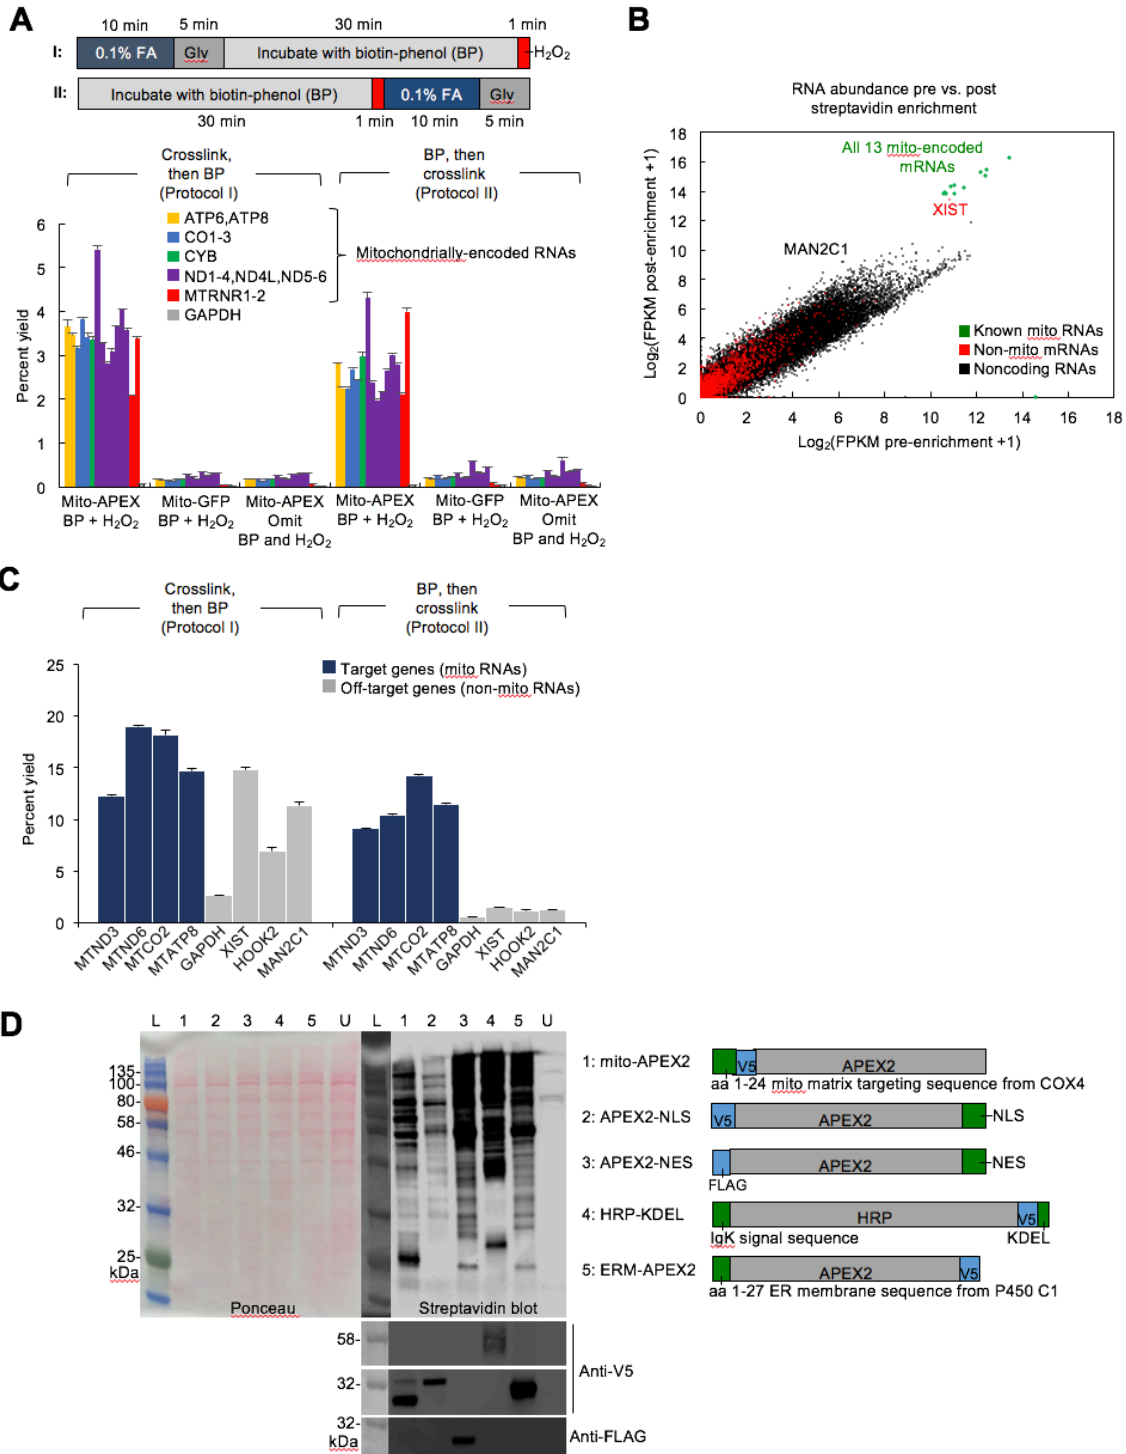

599

600

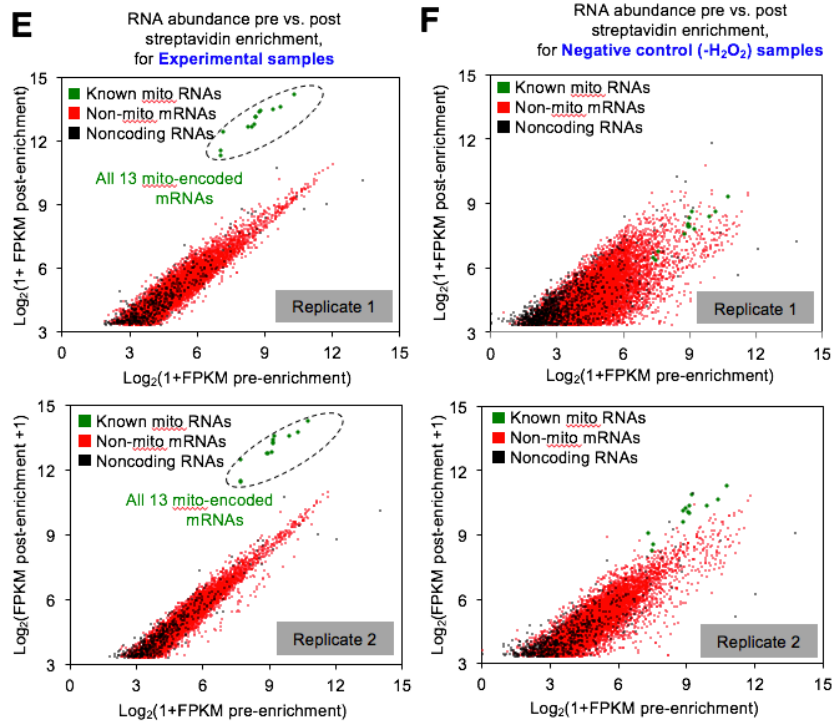

601  
602 **Supporting Figure 1. Optimization of APEX-RIP protocol and additional mitochondrial**  
603 **APEX-RIP data (related to Figure 1).** (A) *Top*: Alternate labeling and crosslinking  
604 protocols. In protocol I., cells are crosslinked with formaldehyde (FA) and quenched with  
605 Glycine (Gly) prior to the introduction of biotin-phenol (BP) and the initiation of APEX-  
606 catalyzed biotinylation with H<sub>2</sub>O<sub>2</sub>. In Protocol II., live cells are incubated in BP, and *in situ*  
607 biotinylation is initiated prior to FA crosslinking. In both cases, cell lysis, streptavidin  
608 enrichment and RNA purification proceed as described (*see methods*). *Bottom*: qRT-PCR  
609 analysis comparing Protocols I and II. Negative control experiments replace mito-APEX with  
610 mito-GFP, omit BP or omit H<sub>2</sub>O<sub>2</sub>. All constructs were APEX1 derivatives, transiently  
611 expressed in HEK 293T cells. Data are the means of three replicates ± one standard  
612 deviation. (B) RNA-Seq analysis of RNAs enriched by protocol I. Although all 13  
613 mitochondrially-encoded mRNAs (green) were enriched, these were accompanied by  
614 substantial contaminating RNAs, including *XIST* and *MAN2C1*. (C) qRT-PCR analysis  
615 comparing Protocols I. and II., including off-target controls designed using the results from  
616 RNA-Seq. Note the superior enrichment obtained using Protocol II. Cells in this experiment  
617 stably-expressed mito-APEX2. This protocol and cell line were used to collect all data in  
618 (Figure 1). Data are the means of three replicates ± one standard deviation. (D)  
619 Characterization of all APEX2 fusion constructs used in this work. HEK 293T cells stably  
620 expressing the indicated constructs (*right*) were labeled and crosslinked via Protocol II.,  
621 lysed and analyzed by SDS-PAGE, blotting with streptavidin-HRP, Anti-V5 and anti-FLAG. L:  
622 ladder; U: untransfected HEK 293T cells. (E) Data from additional replicates of the  
623 mitochondrial APEX-RIP experiment, depicted as in (Figure 1D). (F) In the absence of H<sub>2</sub>O<sub>2</sub>  
624 treatment, mito-APEX-RIP fails to enrich mitochondrial target genes. Data from individual  
625 replicates are shown.

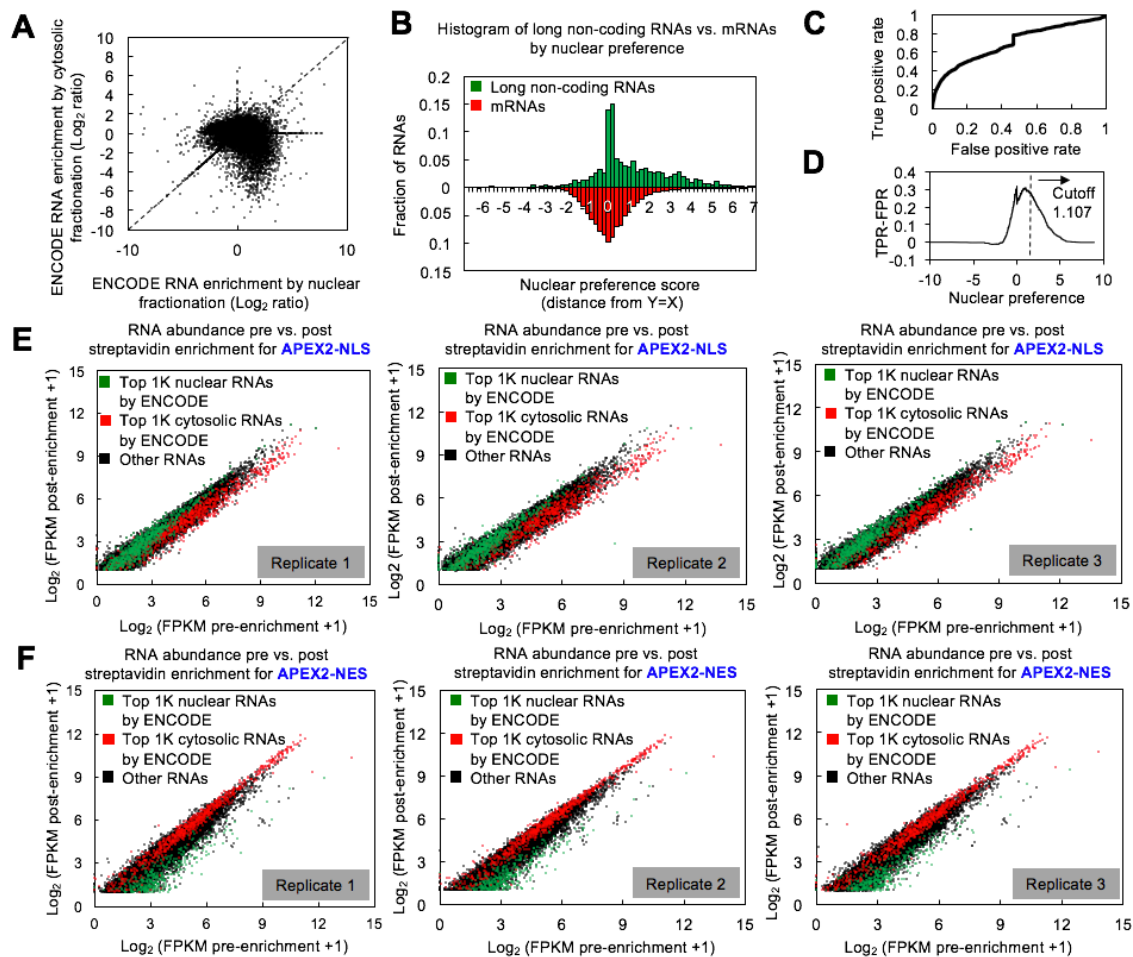

626  
 627 **Supporting Figure 2. Identification of ENCODE-derived nuclear RNA standards;**  
 628 **additional representations of the APEX-RIP nuclear—cytoplasmic data. (A)** human cell  
 629 line (NHEK) fractionation data from ENCODE(Dunham et al. 2012), illustrating the relative  
 630 enrichment of genes during nuclear and cytosolic fractionation. RNA enrichments are  
 631 calculated as in (Figure 2B) (see methods). Displayed are the average values of three  
 632 replicates, for all genes with  $FPKM_{pre\ enrichment} \geq 1.0$ . Dashed line denotes  $y = x$  line. (B)  
 633 Distribution of genes by nuclear preference score (see methods). lncRNAs, predicted to be  
 634 mostly nuclear, are plotted in green, and mRNAs, predicted to be mostly cytosolic, are  
 635 plotted in red. (C–D) Selection of nuclear-enriched RNA standards using ENCODE  
 636 fractionation data. (C) ROC analysis applied to histogram in (B). For each nuclear preference  
 637 cutoff value, the True Positive Rate (TPR)—defined as the fraction of lncRNAs above the  
 638 cutoff—was plotted against the False Positive Rate (FPR)—defined as the fraction of mRNAs  
 639 above the cutoff. (D). Using the output of ROC analysis, a nuclear preference score cut-off  
 640 value was calculated, defined as the first local maximum in the graph of (TPR-FPR) versus  
 641 Nuclear Preference Score. This value was applied to obtain a list of 3056 nuclear-enriched  
 642 standard RNAs. (E) Data from individual replicates of the NLS-APEX-RIP experiment. Genes  
 643 enriched by nuclear and cytoplasmic fractionation in the ENCODE dataset are colored green  
 644 and red, respectively. (F) Data from individual replicates of the NES-APEX-RIP experiment,  
 645 depicted as in (E).

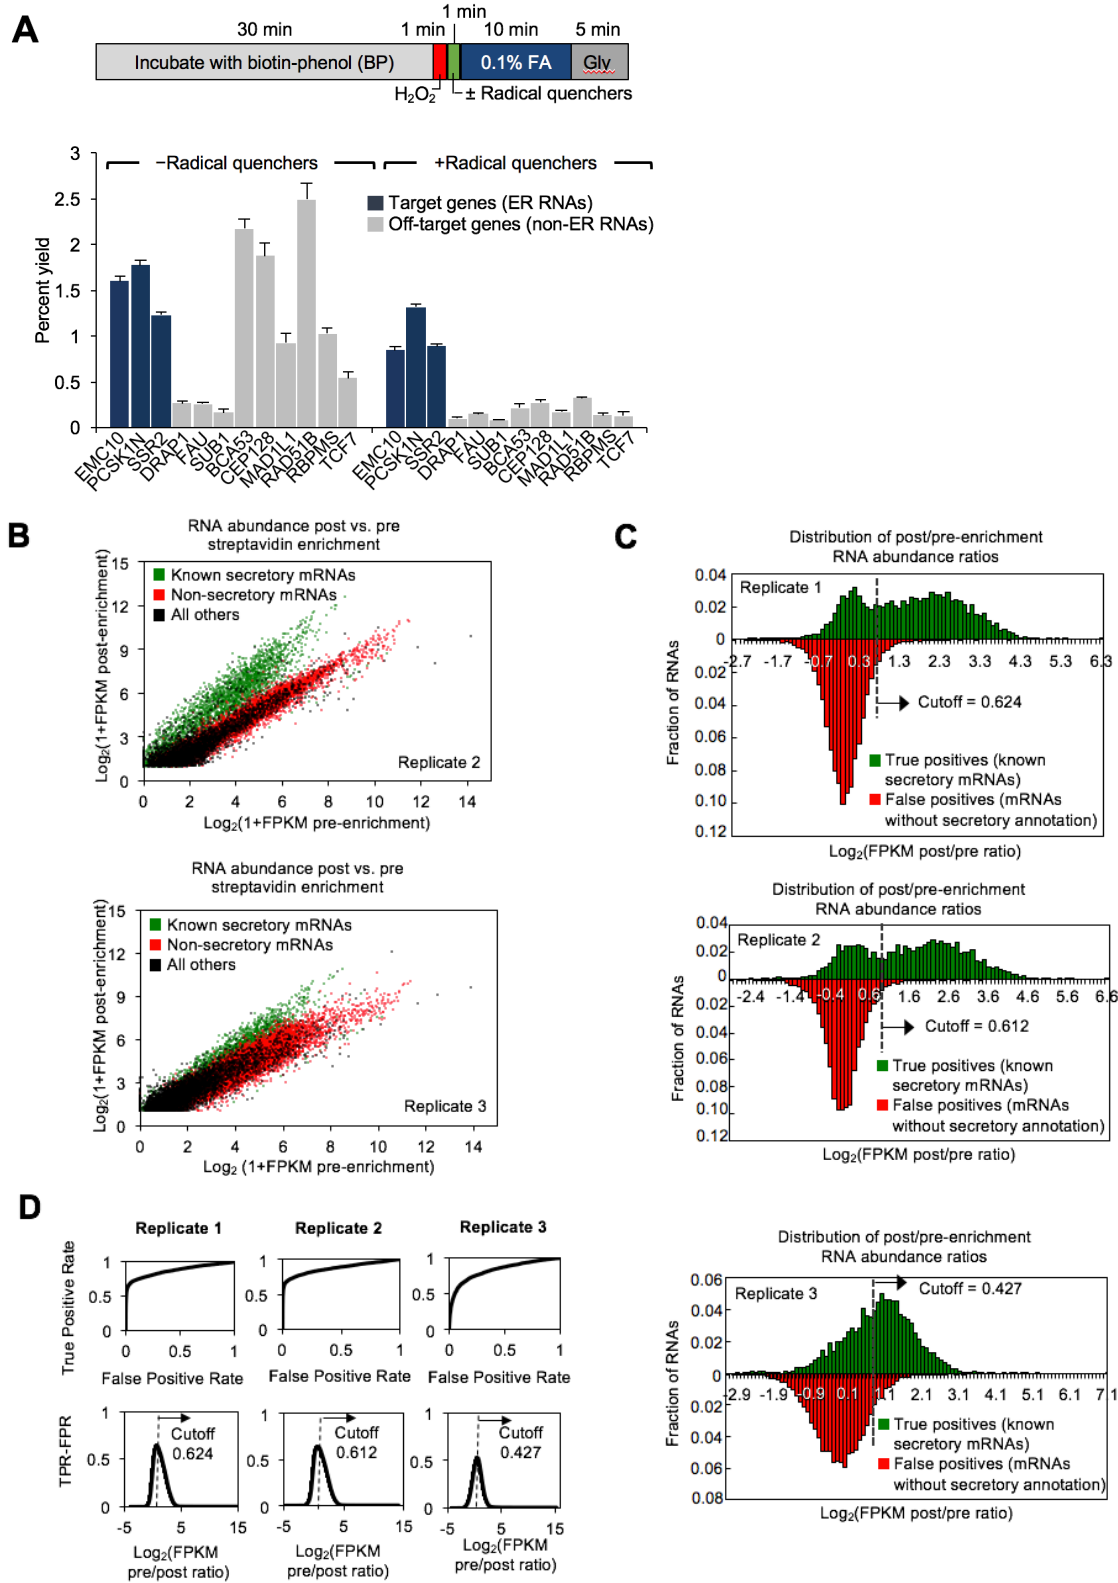

646

647

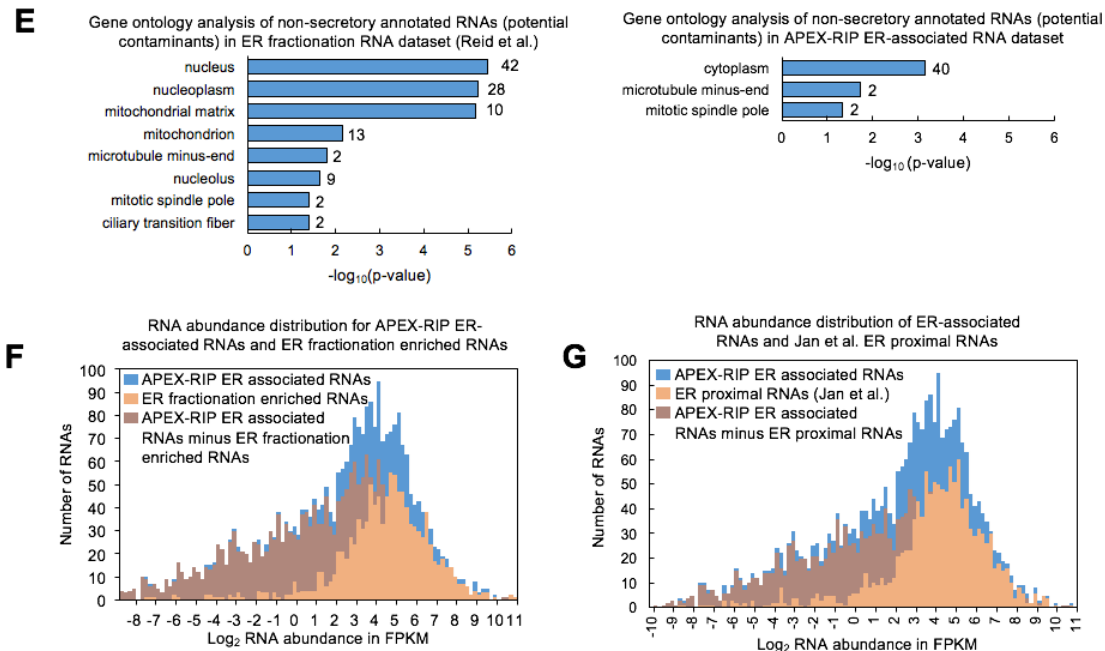

648  
649 **Supporting Figure 3. Further optimization of the APEX-RIP protocol; additional HRP-**  
650 **KDEL data (Related to Figure 3).** (A) Addition of a radical quenching step between APEX2  
651 labeling and formaldehyde crosslinking improves the specificity of RNA capture. *Top:*  
652 schematic of the revised labeling–crosslinking workflow. *Bottom:* qRT-PCR analysis of the  
653 ER-APEX-RIP experiment with and without this additional quenching step, as in (Figure  
654 S1C). The radical quenchers used were Trolox and ascorbic acid. (B–D) Quality assessment  
655 for individual replicates of the ER-APEX-RIP experiment. (B) Data for two additional  
656 replicates of the HRP-KDEL APEX-RIP experiment, depicted as in (Figure 3F). (C)  
657 Histograms showing the distribution of RNA enrichment values  $-\log_2\left(\frac{[\text{FKPM}]_{\text{post enrichment}}}{[\text{FKPM}]_{\text{pre enrichment}}}\right)$ —for mRNAs encoding known secretory proteins (top  
658 histograms, green), and mRNAs encoding non-secretory proteins (bottom histograms, red).  
659 Significance cutoffs were determined using ROC analysis (*see below*). Known secretory and  
660 non-secretory standard mRNAs were cataloged as described (*see methods*). (D)  
661 Determination of significance thresholds ratio cut-offs by ROC analysis. Data were  
662 processed as described in Figures S2D–E, using True Positive secretory and False Positive  
663 non-secretory standard RNAs (*see methods*). Given these analyses, and those in (B–C), only  
664 data from Replicates 1 and 2 were used to generate our final ER-associated RNA list. To do  
665 this, the individual ROC-derived thresholds were used to calculate significantly enriched  
666 genes from each dataset, and the final ER-associated RNA list was defined as the  
667 intersection of these two lists. (E) Gene ontology (GO) analysis of mRNAs in ER datasets  
668 lacking secretory annotation. *Left:* non-secretory mRNAs enriched by biochemical  
669 fractionation(Reid and Nicchitta 2012) predominantly exhibit nuclear and mitochondrial  
670 annotation. *Right:* non-secretory mRNAs enriched by ER-APEX-RIP have predominantly  
671 cytosolic annotation. All terms shown have  $p < 0.05$ , as assessed using DAVID(Huang,  
672 Sherman, and Lempicki 2009). (F–G) APEX-RIP recovers low-abundance targets with  
673 greater efficiency than do conventional approaches. In each case, starting abundances are  
674 defined by ENCODE. (F) Comparison of APEX-RIP to biochemical fractionation. (G)  
675 Comparison of APEX-RIP to proximity-restricted ribosome profiling.  
676  
677  
678

## 679 **Experimental Procedures**

680

### 681 **Plasmids and cloning**

682 The pCDNA3 mito-APEX plasmid was published previously (Rhee et al. 2013). The  
683 Mito-APEX2 construct was cloned from this plasmid using a two-step protocol. First,  
684 the A134P mutation(Lam et al. 2014) was introduced into the APEX gene itself,  
685 using QuikChange mutagenesis (Agilent), and thereafter the APEX2 gene was moved  
686 to the lentiviral vector pLX304 via Gateway cloning (Thermofisher), to generate  
687 plasmid pLX304 mito-APEX2. Other APEX-fusion constructs (pLX304 APEX2-NLS,  
688 pLX304 APEX2-NES, and plx304 ERM-APEX2) were cloned by Gibson assembly  
689 (NEB), using PCR to add targeting sequences and Gibson Assembly homology arms  
690 to the APEX2 gene, and joining the resulting insert into the pLX304 vector digested  
691 by BstBI and NheI. For HRP-KDEL, HRP C previously published(Martell et al. 2016)  
692 was used as a template to make HRP-KDEL-IRES-Puromycin PCR fragment. Then the  
693 insert was cloned into PCDNA3 vector digested by NotI and XbaI. Targeting  
694 sequences and restriction sites for all constructs are listed in (Table S1).

695

### 696 **Mammalian cell culture**

697 Human embryonic kidney (HEK) 293T cells were obtained from ATCC, and cultured  
698 in growth media consisting of 1:1 DMEM:MEM (Cellgro), supplemented with 10%  
699 Fetal Bovine Serum (FBS), 50 units/mL penicillin, and 50 µg/mL streptomycin, at 37  
700 °C and under 5% CO<sub>2</sub>. Cells were discarded at 25 passages, and were periodically  
701 tested for Mycoplasma contamination using Universal Mycoplasma Detection kit  
702 (ATCC). For fluorescence microscopy imaging experiments (Figures 1B, 2A and 3C),  
703 cells were grown on 7×7-mm glass coverslips in 48-well plates. To improve cell  
704 adherence, coverslips were pretreated with 50 µg/mL fibronectin (Millipore) for 20  
705 min at 37 °C and washed once with Dulbecco's phosphate-buffered saline (DPBS),  
706 pH 7.4. Cells used for generating lentivirus were grown on T25 plates, in MEM  
707 supplemented as above, at 37 °C under 5% CO<sub>2</sub>.

708

### 709 **Preparation of cell lines stably expressing APEX-fusion constructs**

710 To prepare lentivirus, one ~70% confluent T25 plate of HEK 293T cells, grown as  
711 above, was co-transfected with 2.5 µg of APEX2 fusion plasmid, along with 0.25 µg  
712 and 2.25 µg, respectively, of the lentivirus packaging plasmids VSV-G, and  
713 dR8.91(Pagliarini et al. 2008). Transfection mixes used 10 µL Lipofectamine 2000  
714 (Invitrogen) and were brought to a final volume of 2 mL with unsupplemented  
715 MEM. The cells were transfected for 3 hours, after which media was replaced with 2  
716 ml of fresh growth media with FBS. After 48 hours, the lentiviral supernatant was  
717 collected by aspiration and filtered through a 0.45 µm syringe-mounted filter. This  
718 filtered supernatant was immediately used to infect cells. HEK293T cells, grown in  
719 6-well plates as described above, were infected at ~50% confluency, grown for 2  
720 days, followed by selection in growth medium supplemented with 8 µg/mL  
721 blasticidin for 7 days, before further analysis.

722

723 For the cells stably expressing HRP-KDEL, HEK293T cells at ~60%  
confluency, grown in 6-well plates as described above, were transfected with the



724 mixture of 150 µg of plasmid and 10 µL Lipofectamine 2000 (Invitrogen) in  
725 unsupplemented MEM for 3 hours, after which media was replaced with 2 ml of  
726 fresh growth media with FBS. After 48 hours, the cells were trypsinized and  
727 replated in T25 flask in growth medium supplemented with 1 µg/mL puromycin for  
728 7 days, before further analysis.

729

### 730 ***In situ* biotinylation and crosslinking**

731 Stable-expression HEK 293T cells were grown to 90% confluency in 6-well plates, as  
732 described above. For the crosslinking-then-BP biotinylation protocol ([Figure S1A](#),  
733 [top](#)), cells were washed once with 5 mL PBS, and crosslinked in 5 mL 0.1% (v/v)  
734 formaldehyde in PBS for 10 min at room temperature, with gentle agitation. The  
735 crosslinking reaction was quenched by addition of glycine (1.2 M, in PBS) to final  
736 concentration 125 mM, and gentle agitation for 5 minutes at room temperature.  
737 Crosslinked cells were then washed three times with PBS and incubated with 500  
738 µM biotin-phenol (BP) (Rhee et al. 2013) in PBS at room temperature, for 30 min.  
739 Thereafter, H<sub>2</sub>O<sub>2</sub> was added to a final concentration 1 mM, for 1 min. The liquid  
740 phase was then removed by aspiration, and cells were washed twice with 2 mL  
741 quenching solution (5 mM Trolox, 10 mM Ascorbate, 10 mM sodium azide, in PBS).  
742 Crosslinked, labeled cells were collected by scraping, and pelleted by centrifugation,  
743 and either processed immediately or flash frozen in liquid nitrogen and stored at -  
744 80 °C before further analysis.

745 For the BP-then-crosslinking protocol ([Figure S1A, bottom](#)) used for mito-  
746 APEX2 experiments ([Figure 1](#)), cell growth media was replaced with fresh media  
747 supplemented with 500 µM BP. Cells were incubated in BP-supplemented media for  
748 30 minutes at 37 °C, after which H<sub>2</sub>O<sub>2</sub> was added to a final concentration of 1 mM.  
749 After 1 min, the media was replaced with 5 mL crosslink-quench solution (0.1%  
750 (v/v) formaldehyde, 10 mM ascorbate, and 5 mM Trolox, in PBS) for one minute, to  
751 simultaneously quench the APEX2 BP labeling reaction and initiate formaldehyde  
752 crosslinking. Thereafter, cells were washed and incubated in 5 mL of fresh crosslink-  
753 quench for two additional 1-minute incubation steps, followed by a third, 8-minute  
754 wash. Thereafter, crosslinking was terminated by the addition of Glycine, and cells  
755 were harvested as described above.

756 The BP-quench-then-crosslinking protocol ([Figure S3A](#)) used for all other  
757 subcellular compartments was identical to the BP-then-crosslinking protocol,  
758 except that, following BP-labelling, and prior to the addition of crosslink-quench  
759 solution, cells were incubated in 2 mL azide-free quenching solution (10 mM  
760 ascorbate and 5 mM Trolox, in PBS) for one minute. Subsequently, cells were  
761 subjected to only two (1 and 9 minute) treatments in crosslink-quench solution.  
762 Thereafter, crosslinking was terminated by the addition of Glycine, and cells were  
763 harvested as described above.

764

### 765 **Immunofluorescence staining and microscopy**

766 For immunofluorescence experiments ([Figures 1B, 2A, and 3C](#)), stable APEX- or  
767 HRP-expressing cells were BP-labeled and crosslinked, as above, and subsequently  
768 fixed with 4% (v/v) paraformaldehyde in PBS at room temperature for 10 min. Cells

769 were then washed with PBS three times and permeabilized with cold methanol at –  
770 20 °C for 5 min. Cells were washed again three times with room-temperature PBS  
771 and then incubated with primary antibodies in PBS-supplemented with 1% (w/v)  
772 Bovine Serum Albumin (BSA)–for 1 h at room temperature. After washing three  
773 times with PBS, cells were incubated with secondary antibodies and neutravidin-  
774 AlexaFluor647 (1:1000 dilution) in BSA-supplemented PBS for 30 min. Cells were  
775 then washed three times with PBS and imaged by confocal fluorescence microscopy,  
776 or in PBS at 4 °C in light-tight containers prior to imaging. Primary and secondary  
777 antibodies used were listed in [Table S2](#).

778 Fluorescence confocal microscopy was performed with a Zeiss AxioObserver  
779 microscope with 63× oil-immersion objectives, outfitted with a Yokogawa spinning  
780 disk confocal head, a Cascade II:512 camera, a Quad-band notch dichroic mirror  
781 (405/488/568/647), 405 (diode), 491 (DPSS), 561 (DPSS) and 640 nm (diode)  
782 lasers (all 50 mW). Alexa Fluor488 (491 laser excitation, 528/38 emission), Alexa  
783 Fluor 568 (561 laser excitation, 617/73 emission), and AlexaFluor647 (640 laser  
784 excitation, 700/75 emission) and differential interference contrast (DIC) images  
785 were acquired through a 63x oil-immersion lens. Acquisition times ranged from 100  
786 to 1,000 ms. For imaging quantitation and analysis, we used the SlideBook 6.0  
787 software (Intelligent Imaging Innovations) to process and normalize the images.

788 The data in these figures ([Figure 1B, 2A, and 3C](#)) are representative of three  
789 independent experiments with  $\geq 5$  fields of view each.

790

### 791 **Western and Streptavidin blotting**

792 For blotting experiments ([Figures 1C, 3D and S1D](#)), stable APEX- or HRP-expressing  
793 cells were grown in 6-well plates. After labeling, the cells were harvested by  
794 scraped, pelleted by centrifugation at 3,000×g for 10 min, and stored at –80 °C prior  
795 to use. Thawed pellets were lysed by gentle pipetting in RIPA lysis buffer (50 mM  
796 Tris, 150 mM NaCl, 0.1% SDS, 0.5% sodium deoxycholate, 1% Triton X-100, 5 mM  
797 EDTA), supplemented with 1× protease cocktail (Sigma Aldrich), 1 mM PMSF  
798 (phenylmethylsulfonyl fluoride), for 5 min at 4 °C. Lysates were then clarified by  
799 centrifugation at 15,000×g for 10 min at 4 °C before separation on homemade 8%  
800 SDS-PAGE gels. Gels were transferred to nitrocellulose membranes, stained by  
801 Ponceau S (0.1% (w/v) Ponceau S, 5% (v/v) acetic acid, in water) for 10 min at  
802 room temperature, and imaged. The blots were then blocked with blocking buffer  
803 (3% (w/v) BSA, 0.1% (v/v) Tween-20 in Tris-buffered saline) for 1 h at room  
804 temperature, and incubated with primary antibodies in blocking buffer for 1 h more.  
805 The dilutions of the antibodies are as followed: Mouse anti-V5 antibody (Life  
806 Technologies) 1:1000 dilution and Mouse anti-FLAG antibody (Life Technologies)  
807 1:800 dilution. Blots were rinsed four times for 5 min with wash buffer (0.1%  
808 Tween-20 in Tris-buffered saline), and then immersed in blocking buffer  
809 supplemented with Goat anti-Mouse IgG H + L-HRP Conjugate (1:3,000 dilution, Bio-  
810 Rad), for 1 h at room temperature. Blots were rinsed four times for 5 min with wash  
811 buffer, and developed with the Clarity reagent (Bio-Rad) and imaged on an Alpha  
812 Innotech gel imaging system. Processing of streptavidin blots was similar.

813 Following Ponceau imaging, blots were blocked in blocking buffer for 30 min at  
814 room temperature, immersed in blocking buffer supplemented with streptavidin-

815 HRP (1:3,000 dilution, ThermoFisher Scientific) at room temperature for 15 min,  
816 rinsed with blocking buffer five times for 5 min each, developed and imaged using  
817 the Clarity reagent and an Alpha Innotech gel imaging system.

818 The data in these experiments (Figures 1C, 3D and S1D) were also  
819 reproduced for quality control prior to quantitative PCR and sequencing.

820

### 821 **Streptavidin bead enrichment of biotinylated material and RNA isolation**

822 Unless otherwise noted, all buffers used during RNA isolation were supplemented to  
823 0.1 U/  $\mu$ L RNaseOUT (Thermo Fisher), 1 $\times$ EDTA-free proteinase inhibitor cocktail  
824 (Thermo Fisher) and 0.5 mM DTT, final. APEX- or HRP-expressing stable cells were  
825 grown, labeled, crosslinked and harvested as described above. Labeled cell pellets  
826 were lysed by incubation in 1 mL ice-cold RIPA buffer, supplemented with 10 mM  
827 ascorbate and 5 mM Trolox, for 5 min at 4 °C with end-over-end agitation. Samples  
828 were then sheared as described previously (Hendrickson et al. 2016) using a  
829 Branson Digital Sonifier 250 (Emerson Industrial Automation) at 10% amplitude for  
830 three 30-s intervals (0.7 s on + 1.3 s off), with 30-s resting steps between intervals.  
831 Samples were held in ice-cold metal thermal blocks throughout sonication. Lysates  
832 were then clarified by centrifugation at 15,000 $\times g$  for 5 min at 4 °C, moved to fresh  
833 tubes and diluted with 1 mL Native lysis buffer (NLB: 25mM Tris pH 7.4, 150 mM  
834 KCl, 0.5% NP-40, 5 mM EDTA), supplemented with ascorbate and trolox), each. For  
835 each sample, 20% was removed as “input;” to the remainder was added 50  $\mu$ L of  
836 streptavidin-coated magnetic bead slurry (Pierce) that had been equilibrated by two  
837 washes in 1:1 RIPA:NLB. Samples were incubated for 2 h at 4 °C with end-over-end  
838 agitation. Beads were subsequently washed with the following series of buffers (1  
839 mL each, 5 min per wash, 4 °C, with gentle end-over-end agitation): (1) RIPA buffer,  
840 supplemented with trolox and ascorbate, (2) RIPA buffer without radical quenchers,  
841 (3) high salt buffer (1 M KCl, 50 mM Tris, pH 8.0, 5 mM EDTA), (4) urea buffer (2 M  
842 Urea, 50 mM Tris, pH 8.0, 5 mM EDTA), (5) RIPA Buffer, (6) 1:1 RIPA: NLB, (7) NLB,  
843 and (8) TE (10 mM Tris, pH 7.4, 1 mM EDTA).

844 Enriched RNAs were released from the beads by proteolysis in 100  $\mu$ L of  
845 Elution Buffer (2% N-lauryl sarcoside, 10mM EDTA, 5mM DTT, in 1X PBS,  
846 supplemented with 200  $\mu$ g proteinase K (Ambion) and 4 U RNaseOUT) at 42 °C for  
847 1h, followed by 55 °C for 1h, as previously described (Hendrickson et al. 2016).  
848 Eluted samples were cleaned up using Agencourt RNAClean XP magnetic beads  
849 (Beckman Coulter), following the manufacturer’s 1.5 mL tube format protocol, and  
850 eluted into 85  $\mu$ L H<sub>2</sub>O. Thereafter, contaminating DNA was removed by digestion  
851 with 5 U RQ1 RNase-free DNase I (Promega) in 100  $\mu$ L of the manufacturer’s  
852 supplied buffer (1X final concentration) at 37 °C for 30 min. Purified RNAs were  
853 again cleaned up using Agencourt RNAClean XP magnetic beads, as above, and  
854 eluted into 30  $\mu$ L H<sub>2</sub>O. The concentration and integrity of all samples was measured  
855 using an Agilent 2100 Bioanalyzer, following the “RNA Nano” or “RNA Pico”  
856 protocols, where appropriate. Samples were not heat-cooled prior to loading  
857 Bioanalyzer chips.

858

### 859 **Quantitative RT-PCR**

860 For quantitative RT-PCR (qRT-PCR, [Figures S1A, S1C, 3E, and S3A](#)) RNA samples  
861 were reverse transcribed using the SuperScript III Reverse Transcriptase kit  
862 (ThermoFisher Scientific), priming with random hexamers (ThermoFisher  
863 Scientific) according to the manufacturer's protocol. Samples were diluted with  
864 water, mixed with gene specific primers ([Table S3](#)), and Rox-normalized FastStart  
865 Universal SYBR Green Master Mix (Roche), and aliquotted into 384-well plates. qRT-  
866 PCR was performed on an Applied Biosystems 7900HT Fast real time PCR  
867 instrument, in quadruplicate. All threshold cycles ( $C_t$ , calculated per well) and  
868 efficiencies ( $\epsilon$ , calculated per primer pair), were calculated from "clipped" data,  
869 using Real time qPCR Miner (Zhao and Fernald 2005). Raw  $C_t$  values were corrected  
870 to account for the differences in sample volume, and percent yields were calculated  
871 via the  $\Delta C_t$  method:

$$872 \quad \text{yield} = 100 \times (1 + \epsilon)^{\Delta C_t}$$

$$873 \quad \dots \text{wherein, } \Delta C_t = {}^{corr}C_{t_{input}} - {}^{corr}C_{t_{RIP}}$$

874  
875  
876  
877 Experimental uncertainties were calculated as described previously (Shechner et al.  
878 2015). Given  $D = A - B$ , uncertainty was calculated using the formula:

$$879 \quad \sigma_D = \sqrt{(\sigma_A)^2 + (\sigma_B)^2}$$

880  
881  
882 ...wherein  $\sigma_A$  and  $\sigma_B$  are the measurement errors of A and B, respectively. For P, the  
883 product or quotient of values A and B, uncertainty was calculated using the formula:

$$884 \quad \sigma_P = P \times \sqrt{\left(\frac{\sigma_A}{A}\right)^2 + \left(\frac{\sigma_B}{B}\right)^2}$$

885  
886 The uncertainties of other functions,  $f(x)$ , were calculated using the first derivative  
887 approximation:

$$888 \quad \sigma_{f(x)} = \sigma_x \times f'(x)$$

889  
890 Sample sizes were determined in accordance with standard practices used in similar  
891 experiments in the literature; no sample-size estimates were performed to ensure  
892 adequate power to detect a prespecified effect size. Experiments were neither  
893 randomized nor blinded to experimental conditions. Each samples contained four  
894 replicates and no samples were excluded from analysis.

895 The experiments for [Figures S1A, S1C, 3E, and S3A](#) were performed once. For  
896 statistical analysis on [Figure 3E](#), percent yield of 6 target genes were compared  
897 against percent yield of 6 non-target genes using paired t-test for both HRP-KDEL  
898 and ERM-APEX2. For comparison between ERM-APEX2 and APEX2-NES, 12 target  
899 and non-target genes were compared against each other using paired t-test.

900

901 **Library preparation, sequencing, and quantification**

902 Purified RNA samples were depleted of ribosomal RNA using the Ribo-Zero Gold  
903 rRNA removal kit (Illumina), using 1  $\mu$ L or 2  $\mu$ L of Ribo-Zero rRNA Removal Solution  
904 for samples with  $\leq 16$  ng or  $\geq 50$  ng total input RNA mass, respectively, in 20  $\mu$ L final  
905 reaction volume. Eluted RNA was cleaned up with Agencourt RNAClean XP beads  
906 and eluted with 19.5  $\mu$ L of Elute, Prime, Fragment mix from the TruSeq RNA sample  
907 preparation kit, v2 (Illumina). Thereafter, libraries were prepared using the TruSeq  
908 RNA sample preparation kit, according to the manufacturer's instructions, starting  
909 from "Incubate RFP" step. Each library was given a unique index during synthesis.  
910 Library concentration and quality were confirmed on an Agilent 2100 Bioanalyzer,  
911 using "DNA High Sensitivity" kits.

912 Indexed libraries were pooled in equimolar concentrations, with no more  
913 than ten libraries per pool, and subjected to 50 cycles of paired end sequencing,  
914 followed indexing, on two lanes of Illumina HiSeq 2500 flow cells, run in rapid mode  
915 (Genomics Core, Broad Institute of Harvard and MIT).

916 In general, the experiments for each construct were performed in three  
917 biological replicates. The mito-APEX experiment in [Figure S1B](#) and the mito-APEX2  
918 negative control experiment (omit  $H_2O_2$ ) in [Figure S1F](#) was performed in two  
919 biological replicates.

920

### 921 **Quantification of RNA Abundances and Folds Enrichment; Assembly of True** 922 **positive and False positive lists**

923 Deep sequencing reads were mapped to human genome assembly hg19 and UCSC  
924 known genes using TopHat2, set to default options(Kim et al. 2013). Transcript- and  
925 gene-level abundances were quantified and Cuffdiff2, set to default options(Trapnell  
926 et al. 2013), and 0.01 was added to all quantified values for ENCODE data.

927 Enrichment analysis (*e.g.* [Figures 1D, 3F, S1B, E, F, S2E, F, and S3B](#)), was restricted to  
928 RNAs with FPKMs  $\geq 1.0$  following streptavidin pulldown. Fold enrichments were  
929 calculated as follows:

930

$$931 \quad \text{Fold Enrichment} = \log_2 \left[ \frac{FPKM_{\text{Post streptavidin enrichment}}}{FPKM_{\text{Pre streptavidin enrichment}}} \right]$$

932

933 To call significantly enriched genes from our data, ENCODE data(Dunham et  
934 al. 2012), and ER-fractionation data(Reid and Nicchitta 2012), threshold cutoffs  
935 were determined using Receiver Operator Characteristic (ROC) analysis(Fawcett  
936 2006), employing sets of true-positive and false-positive genes identified as  
937 described below. At each fold enrichment value of the data, true positive rate (TPR –  
938 fraction of detected true positive genes above the fold enrichment value) and false  
939 positive rate (FPR – fraction of detected false positive genes above the fold  
940 enrichment value) are calculated. The fold enrichment value that maximizes TPR-  
941 FPR is chosen as the fold enrichment cutoff. In mitochondrial and ER-associated  
942 APEX-RIP experiments, ROC analysis was based on fold enrichment values; in the  
943 nuclear-cytoplasmic partitioning experiment, it was based on calculated nuclear  
944 preference scores.

945 Nuclear preference scores were calculated as follows. To each gene,  $i$ , we  
946 assigned coordinates,  $(x,y) = (\log_2 N_i, \log_2 C_i)$ , where  $N_i$  and  $C_i$  denote to the fold-  
947 enrichments from nuclear- (NLS) and cytosolic- (NES) APEX-RIP, respectively. In  
948 this space, the line  $y=x$  (or rather,  $\log_2 N = \log_2 C$ ) corresponds to all genes that were  
949 equally enriched in both nuclear and cytosolic APEX-RIP, and hence do not  
950 preferentially reside in either compartment. The nuclear preference score for gene  $i$   
951 (NPS $_i$ ), is therefore defined as the minimum distance between its coordinates and  
952 the line  $\log_2 N = \log_2 C$ . This is equivalent to calculating the distance between points  
953  $(x_1, y_1) = (\log_2 N_i, \log_2 C_i)$  and  $(x_2, y_2) = (0.5(\log_2 N_i + \log_2 C_i), 0.5(\log_2 N_i + \log_2 C_i))$ . Hence:  
954

$$955 \quad NPS_i = \sqrt{(\log_2 N_i - 0.5(\log_2 N_i + \log_2 C_i))^2 + (\log_2 C_i - 0.5(\log_2 N_i + \log_2 C_i))^2}$$

956

957 ...which reduces to:

$$958 \quad NPS_i = \left(\frac{1}{\sqrt{2}}\right)(\log_2 N_i - \log_2 C_i)$$

959

960 The true and false positive gene sets needed for ROC analysis were defined as  
961 follows:

962 (1) For mitochondrial APEX-RIP, true positives corresponded to the thirteen  
963 mitochondrial-encoded mRNAs; false positive RNAs corresponded to nuclear-  
964 encoded long non-coding RNAs.

965 (2) For the nuclear and cytosolic partitioning experiment, true and false  
966 positive gene lists were compiled using available ENCODE human cell line (NHEK-  
967 Normal Human Epidermal Keratinocytes) nuclear-cytoplasmic fractionation  
968 data (Dunham et al. 2012). We calculated fold-enrichments for RNAs in each  
969 compartment (scaled relative to the whole cell RNA, [Figure S2A](#)), and used these  
970 values to derive Nuclear Preference Scores, as described above. True positive and  
971 true negative nuclear RNAs were then defined as the 1000 transcripts with the  
972 highest and lowest NPSs, respectively ([Figure 2B](#); [Table S2 tab 4](#)). Using these gene  
973 lists to perform ROC analysis on the original ENCODE data produced a significance  
974 threshold cutoff at an NPS of 1.107 ([Figure S2B-D](#)), and lists of the 5467 and 10130  
975 RNAs called as being enriched in the nucleus and cytoplasm, respectively ([Table S2](#),  
976 [tabs 4 and 5](#)).

977 (3) For ER-APEX-RIP, most true positive genes were defined using data from  
978 ER-localized proximity-dependent ribosome profiling (Jan, Williams, and Weissman  
979 2014), corresponding to all RNAs with input RPKM  $\geq 5.0$ , input count  $\geq 12$ , and  
980  $\log_2(\text{fold enrichment}) \geq 0.904$  ([Table S3 tab 4](#)). Additional true positive genes were  
981 predicted by Phobius as having secretory signals, and were absent in  
982 MitoCarta (Pagliarini et al. 2008). (Rhee et al. 2013) False positive RNAs included all  
983 genes lacking secretory signals, as predicted by Phobius, SignalP, and TMHMM.

984

### 985 **Coverage and Specificity analysis of nuclear, cytosolic, and ER-proximal RNAs**

986 To estimate the coverage (recall) and specificity of APEX-RIP at each subcellular  
987 compartment, we assembled lists of established target and off-target genes tailored  
988 for that compartment.

989 For analysis of the nuclear–cytosolic datasets (Figure 2F), our reference  
990 nuclear gene list comprised 827 lncRNAs with average RNA pre-enrichment  
991 abundances of 1.0 or greater. Our reference off-target list comprised the set of 1260  
992 ER-proximal RNAs defined using proximity-restricted ribosome profiling (Jan,  
993 Williams, and Weissman 2014).

994 For analysis of the ER-proximal dataset (Figure 3I–J), our reference gene list  
995 comprised 71 mRNAs encoding ER-resident proteins (Table S3 tab 5). Our reference  
996 off-target list comprised (7589) RNAs lacking secretory annotation, as assessed  
997 using Phobius (Käll, Krogh, and Sonnhammer 2004), TMHMM (Krogh et al. 2001),  
998 SignalP (Petersen et al. 2011), and which lacked the GOCC terms “Endoplasmic  
999 reticulum,” “Golgi,” “membrane,” and “extracellular” (Ashburner et al. 2000).

1000 For analysis of contaminants in ER datasets (Figure S3E), the RNAs that  
1001 encode proteins with no predicted secretory annotation by Phobius, TMHMM, and  
1002 SignalP and lacked GOCC terms “Endoplasmic reticulum,” “Golgi,” “membrane,” and  
1003 “extracellular” were submitted to DAVID Bioinformatics analysis (Huang, Sherman,  
1004 and Lempicki 2009) to find Gene ontology term enrichment against human  
1005 background. Only terms with p-values less than 0.05 were shown.  
1006

1007 **Supplementary Table S1: Genetic constructs used in this study**

| Name           | Features                                 | Promoter/Vector | Details                                                                                                                     |
|----------------|------------------------------------------|-----------------|-----------------------------------------------------------------------------------------------------------------------------|
| Mito-V5-APEX   | NotI-mito-BamHI-V5-APEX-XhoI             | CMV/pCDNA3      | Mito is a 24-amino acid mitochondrial targeting sequence (MTS) derived from COX4.<br>V5: GKPIP NPLLGLDST                    |
| mito-V5-APEX2  | mito-BamHI-V5-APEX2-NheI                 | CMV/pLX304      |                                                                                                                             |
| Mito-GFP       | NotI-mito-BamHI-BFP-XhoI                 | CMV/pCDNA3      |                                                                                                                             |
| V5-APEX2-NLS   | NotI-V5-APEX2-EcoRI-3xNLS-NheI           | CMV             | NLS: DPKKKRKV                                                                                                               |
| FLAG-APEX2-NES | BstBI-FLAG-APEX2-NES-XhoI                | CMV/pLX304      | NES: LQLPPLERLTLD                                                                                                           |
| HRP-V5-KDEL    | NotI-IgK-HRP-V5-KDEL-IRES-puromycin-XbaI | CMV             | IgK is N-terminal signaling sequence that brings protein to ER (METDTLLLWVLLLWVPGSTG D).<br>KDEL is ER-retaining sequence   |
| ERM-APEX2-V5   | BstBI-ERM-APEX2-V5-NheI                  | CMV/pLX304      | ERM is ER membrane targeting sequence derived from N-terminal 27 amino acids of rabbit P450 C1 (MDPVVVLGLCLSLLLSLWK QSYGGG) |

1008

1009 **Supplementary Table 2. Antibodies used for immunofluorescence**

| Antibody                 | Source | Company           | Catalog number | Dilution | Associated Figure     |
|--------------------------|--------|-------------------|----------------|----------|-----------------------|
| Anti V5                  | Mouse  | Life Technologies | R960-25        | 1:1000   | Figure 1B, 2A, and 3A |
| Anti FLAG                | Mouse  | Agilent           | 200472         | 1:500    | Figure 2A             |
| Anti Mouse-AlexaFluor488 | Goat   | Life Technologies | A-11029        | 1:1000   | Figure 1B, 2A, and 3A |

1010



1011 **Supplementary Table 3. qRT-PCR primers used in this study**

| Primer/probe name | Sequence (5'-3')          |
|-------------------|---------------------------|
| MT-ND1 forward    | CACCTCTAGCCTAGCCGTTT      |
| MT-ND1 reverse    | CCGATCAGGGCGTAGTTTGA      |
| MT-ND2 forward    | CTTAAACTCCAGCACCACGAC     |
| MT-ND2 reverse    | AGCTTGTTTTAGGTGCGAGA      |
| MT-ND3 forward    | CCGCGTCCCTTTCTCCATAA      |
| MT-ND3 reverse    | AGGGCTCATGGTAGGGGTAA      |
| MT-ND4 forward    | ACAACACAATGGGGCTCACT      |
| MT-ND4 reverse    | CCGGTAATGATGTCGGGGTT      |
| MT-ND4L forward   | TCGCTCACACCTCATATCCTC     |
| MT-ND4L reverse   | AGGGCGCAAAGACTAGTATGG     |
| MT-ND5 forward    | TCCATTGTCGCATCCACCTT      |
| MT-ND5 reverse    | GGTTGTTTGGGTTGTGGCTC      |
| MT-ND6 forward    | GGGTTGAGGTCTTGGTGAGT      |
| MT-ND6 reverse    | ACCAATCCTACCTCCATCGC      |
| MT-CYTB forward   | TCTTGCACGAAACGGGATCA      |
| MT-CYTB reverse   | CGAGGGCGTCTTTGATTGTG      |
| MT-COX1 forward   | TCCTTATTCGAGCCGAGCTG      |
| MT-COX1 reverse   | ACAAATGCATGGGCTGTGAC      |
| MT-COX2 forward   | AACCAAACCACTTTCACCGC      |
| MT-COX2 reverse   | CGATGGGCATGAAACTGTGG      |
| MT-COX3 forward   | CTAATGACCTCCGGCCTAGC      |
| MT-COX3 reverse   | AGGCCTAGTATGAGGAGCGT      |
| MT-ATP6 forward   | TTGCTTCATTTCATTGCCCC      |
| MT-ATP6 reverse   | GGGTGGTGATTAGTCGGTTGT     |
| MT-ATP8 forward   | ACTACCACCTACCTCCCTCAC     |
| MT-ATP8 reverse   | GGCAATGAATGAAGCGAACAGA    |
| MT-RNR1 forward   | CATCCCCGTTCCAGTGAGTT      |
| MT-RNR1 reverse   | TGGCTAGGCTAAGCGTTTTGA     |
| MT-RNR2 forward   | CAGCCGCTATTAAGGTTTCGT     |
| MT-RNR2 reverse   | AAGGCGCTTTGTGAAGTAGG      |
| GAPDH forward     | TTTCGACAGTCAGCCGCATCTTCTT |
| GAPDH reverse     | GCCCAATACGACCAAATCCGTTGA  |
| XIST forward      | CCCTACTAGCTCCTCGGACA      |
| XIST reverse      | ACACATGCAGCGTGGTATCT      |
| EMC10 forward     | TTCATTGAGCGCCTGGAGAT      |
| EMC10 reverse     | TTCATTGAGCGCCTGGAGAT      |
| PCSK1N forward    | GAGACACCCGACGTGGAC        |
| PCSK1N reverse    | AATCCGTCAGCAAGTACC        |
| SSR2 forward      | GTTTGGGATGCCAACGATGAG     |
| SSR2 reverse      | CTCCACGGCGTATCTGTTCA      |
| TMX1 forward      | ACGGACGAGAAGTGGAGAGA      |
| TMX1 reverse      | ATTTTGACAAGCAGGGCACC      |
| SFT2D2 forward    | CCATCTCCTCATGGGACCAG      |
| SFT2D2 reverse    | GCAGAACACAGGGTAAGTGC      |
| EPT1 forward      | TGGCTTTCTGCTGGTTCGTAT     |
| EPT1 reverse      | AATCCAAACCCAGTCAGGCA      |
| DRAP1 forward     | ACATCCCACCTGAAGCAGTG      |
| DRAP1 reverse     | GATGCCACCAGGTCTTCAA       |
| FAU forward       | TCCTAAGGTGGCCAAACAGG      |
| FAU reverse       | GTGGGCACAACGTTGACAAA      |

|                |                         |
|----------------|-------------------------|
| SUB1 forward   | CGTCACTTCCGGTTCTCTGT    |
| SUB1 reverse   | TGATTTAGGCATCGCTTCGC    |
| LSM6 forward   | CGGACGACCAGTTGTGGTAA    |
| LSM6 reverse   | CCAGGACCCCTCGATAATCC    |
| COPS2 forward  | AGGAGGACTACGACCTGGAAT   |
| COPS2 reverse  | GCCGCTTTTGGGTCATCTTC    |
| CGGBP1 forward | GCCTCGTCCACTTTCCTAA     |
| CGGBP1 reverse | TCATGCCCTTACGTAGGATCGAG |
| BCA53 forward  | TCTTGCTGCTCCACAGTTT     |
| BCA53 reverse  | CAAACACCAAGGAGGGGTCT    |
| CEP128 forward | TACAGTAATGGACAGGCGGG    |
| CEP128 reverse | TCCGGAGTTGGTTCGATTGAT   |
| MAD1L1 forward | CGAGTCTGCCATCGTCCAA     |
| MAD1L1 reverse | GCACTCTCCACCTGCTTCTT    |
| RAD51B forward | TTTGGACGAAGCCCTGCAT     |
| RAD51B reverse | CACAACCTGGTGGACCTGTA    |
| RBPMS forward  | ACAGTCGCTCAGAAGCAGAG    |
| RBPMS reverse  | CGAAGCGGATGCCATTCAAA    |
| TCF7 forward   | TCAACAGCCCACATCCCAC     |
| TCF7 reverse   | AGAGGCCTGTGAACTTGCTT    |
| HOOK2 forward  | TTTGCTGAAAAGGAAGCTGGA   |
| HOOK2 reverse  | GCAACTCCAGATCTGCCTCA    |
| MAN2C1 forward | ATGAGGCCCAACAAGTTCCTG   |
| MAN2C1 reverse | TCTCATAGGTGGCCTGGGAA    |

1012

## 1013 **References**

- 1014 Alán, Lukáš, Jaroslav Zelenka, Jan Ježek, Andrea Dlasková, and Petr Ježek. 2010.  
1015 "Fluorescent in Situ Hybridization of Mitochondrial DNA and RNA." *Acta*  
1016 *Biochimica Polonica* 57 (4): 403–8.  
1017 <http://www.ncbi.nlm.nih.gov/pubmed/21125028>.
- 1018 Ashburner, Michael, Catherine A. Ball, Judith A. Blake, David Botstein, Heather  
1019 Butler, J. Michael Cherry, Allan P. Davis, et al. 2000. "Gene Ontology: Tool for the  
1020 Unification of Biology." *Nature Genetics* 25 (1): 25–29. doi:10.1038/75556.
- 1021 Bahar Halpern, Keren, Inbal Caspi, Doron Lemze, Maayan Levy, Shanie Landen, Eran  
1022 Elinav, Igor Ulitsky, and Shalev Itzkovitz. 2015. "Nuclear Retention of mRNA in  
1023 Mammalian Tissues." *Cell Reports* 13 (12): 2653–62.  
1024 doi:10.1016/j.celrep.2015.11.036.
- 1025 Batish, Mona, Arjun Raj, and Sanjay Tyagi. 2011. "Single Molecule Imaging of RNA In  
1026 Situ." In *RNA Detection and Visualization*, 3–13. doi:10.1007/978-1-61779-005-  
1027 8\_1.
- 1028 Cabili, Moran N, Margaret C Dunagin, Patrick D McClanahan, Andrew Biesch, Olivia  
1029 Padovan-Merhar, Aviv Regev, John L Rinn, and Arjun Raj. 2015. "Localization  
1030 and Abundance Analysis of Human lncRNAs at Single-Cell and Single-Molecule  
1031 Resolution." *Genome Biology* 16 (1): 20. doi:10.1186/s13059-015-0586-4.
- 1032 Chapman-Smith, A, and J E Cronan. 1999. "Molecular Biology of Biotin Attachment to  
1033 Proteins." *The Journal of Nutrition* 129 (2S Suppl): 477S–484S.  
1034 <http://www.ncbi.nlm.nih.gov/pubmed/10064313>.
- 1035 Chen, Chun-Kan, Mario Blanco, Constanza Jackson, Erik Aznauryan, Noah Ollikainen,  
1036 Christine Surka, Amy Chow, Andrea Cerase, Patrick McDonel, and Mitchell  
1037 Guttman. 2016. "Xist Recruits the X Chromosome to the Nuclear Lamina to  
1038 Enable Chromosome-Wide Silencing." *Science (New York, N.Y.)*, August.  
1039 doi:10.1126/science.aae0047.
- 1040 Chen, K. H., A. N. Boettiger, J. R. Moffitt, S. Wang, and X. Zhuang. 2015. "Spatially  
1041 Resolved, Highly Multiplexed RNA Profiling in Single Cells." *Science* 348 (6233):  
1042 aaa6090-aaa6090. doi:10.1126/science.aaa6090.
- 1043 Chi, Sung Wook, Julie B. Zang, Aldo Mele, and Robert B. Darnell. 2009. "Argonaute  
1044 HITS-CLIP Decodes microRNA–mRNA Interaction Maps." *Nature*, June.  
1045 doi:10.1038/nature08170.
- 1046 Csordás, György, Christian Renken, Péter Várnai, Ludivine Walter, David Weaver,  
1047 Karolyn F. Buttle, Tamás Balla, Carmen A. Mannella, and György Hajnóczky.  
1048 2006. "Structural and Functional Features and Significance of the Physical  
1049 Linkage between ER and Mitochondria." *The Journal of Cell Biology* 174 (7):  
1050 915–21. doi:10.1083/jcb.200604016.
- 1051 Damas, Nkerorema Djodji, Michela Marcatti, Christophe Côme, Lise Lotte  
1052 Christensen, Morten Muhlig Nielsen, Roland Baumgartner, Helene Maria  
1053 Gylling, et al. 2016. "SNHG5 Promotes Colorectal Cancer Cell Survival by  
1054 Counteracting STAU1-Mediated mRNA Destabilization." *Nature*  
1055 *Communications* 7 (December): 13875. doi:10.1038/ncomms13875.
- 1056 Derrien, T., R. Johnson, G. Bussotti, A. Tanzer, S. Djebali, H. Tilgner, G. Guernec, et al.  
1057 2012. "The GENCODE v7 Catalog of Human Long Noncoding RNAs: Analysis of  
1058 Their Gene Structure, Evolution, and Expression." *Genome Research* 22 (9):

- 1059 1775–89. doi:10.1101/gr.132159.111.
- 1060 Dunham, Ian, Anshul Kundaje, Shelley F. Aldred, Patrick J. Collins, Carrie A. Davis,  
1061 Francis Doyle, Charles B. Epstein, et al. 2012. “An Integrated Encyclopedia of  
1062 DNA Elements in the Human Genome.” *Nature* 489 (7414): 57–74.  
1063 doi:10.1038/nature11247.
- 1064 Engreitz, Jesse M., Noah Ollikainen, and Mitchell Guttman. 2016. “Long Non-Coding  
1065 RNAs: Spatial Amplifiers That Control Nuclear Structure and Gene Expression.”  
1066 *Nature Reviews Molecular Cell Biology* 17 (12): 756–70.  
1067 doi:10.1038/nrm.2016.126.
- 1068 Fawcett, Tom. 2006. “An Introduction to ROC Analysis.” *Pattern Recognition Letters*  
1069 27 (8): 861–74. doi:10.1016/j.patrec.2005.10.010.
- 1070 Fox, C H, F B Johnson, J Whiting, and P P Roller. 1985. “Formaldehyde Fixation.”  
1071 *Journal of Histochemistry & Cytochemistry* 33 (8): 845–53.  
1072 doi:10.1177/33.8.3894502.
- 1073 Gilbert, Chris, and Jesper Q Svejstrup. 2006. “RNA Immunoprecipitation for  
1074 Determining RNA-Protein Associations in Vivo.” *Current Protocols in Molecular*  
1075 *Biology / Edited by Frederick M. Ausubel ... [et Al.]* Chapter 27 (August): Unit  
1076 27.4. doi:10.1002/0471142727.mb2704s75.
- 1077 Gilbert, Christopher, Arnold Kristjuhan, G Sebastiaan Winkler, and Jesper Q  
1078 Svejstrup. 2004. “Elongator Interactions with Nascent mRNA Revealed by RNA  
1079 Immunoprecipitation.” *Molecular Cell* 14 (4): 457–64.  
1080 <http://www.ncbi.nlm.nih.gov/pubmed/15149595>.
- 1081 Han, Shuo, Namrata D Udeshi, Thomas J Deerinck, Tanya Svinkina, Mark H Ellisman,  
1082 Steven A Carr, and Alice Y Ting. 2017. “Proximity Biotinylation as a Method for  
1083 Mapping Proteins Associated with mtDNA in Living Cells.” *Cell Chemical Biology*  
1084 24 (3): 404–14. doi:10.1016/j.chembiol.2017.02.002.
- 1085 Hendrickson, David G, David R Kelley, Danielle Tenen, Bradley Bernstein, and John L  
1086 Rinn. 2016. “Widespread RNA Binding by Chromatin-Associated Proteins.”  
1087 *Genome Biology* 17 (February): 28. doi:10.1186/s13059-016-0878-3.
- 1088 Hocine, Sami, Pascal Raymond, Daniel Zenklusen, Jeffrey A Chao, and Robert H  
1089 Singer. 2013. “Single-Molecule Analysis of Gene Expression Using Two-Color  
1090 RNA Labeling in Live Yeast.” *Nature Methods* 10 (2): 119–21.  
1091 doi:10.1038/nmeth.2305.
- 1092 Huang, Da Wei, Brad T Sherman, and Richard A Lempicki. 2009. “Systematic and  
1093 Integrative Analysis of Large Gene Lists Using DAVID Bioinformatics  
1094 Resources.” *Nature Protocols* 4 (1): 44–57. doi:10.1038/nprot.2008.211.
- 1095 Hung, Victoria, Stephanie S Lam, Namrata D Udeshi, Tanya Svinkina, Gaelen Guzman,  
1096 Vamsi K Mootha, Steven A Carr, and Alice Y Ting. 2017. “Proteomic Mapping of  
1097 Cytosol-Facing Outer Mitochondrial and ER Membranes in Living Human Cells  
1098 by Proximity Biotinylation.” *eLife* 6 (April). doi:10.7554/eLife.24463.
- 1099 Hung, Victoria, Peng Zou, Hyun-Woo Rhee, Namrata D. Udeshi, Valentin Cracan,  
1100 Tanya Svinkina, Steven A. Carr, Vamsi K. Mootha, and Alice Y. Ting. 2014.  
1101 “Proteomic Mapping of the Human Mitochondrial Intermembrane Space in Live  
1102 Cells via Ratiometric APEX Tagging.” *Molecular Cell* 55 (2): 332–41.  
1103 doi:10.1016/j.molcel.2014.06.003.
- 1104 Ingolia, Nicholas T, Sina Ghaemmaghami, John R S Newman, and Jonathan S

- 1105 Weissman. 2009. "Genome-Wide Analysis in Vivo of Translation with  
1106 Nucleotide Resolution Using Ribosome Profiling." *Science (New York, N.Y.)* 324  
1107 (5924): 218–23. doi:10.1126/science.1168978.
- 1108 Jan, Calvin H, Christopher C Williams, and Jonathan S Weissman. 2014. "Principles of  
1109 ER Cotranslational Translocation Revealed by Proximity-Specific Ribosome  
1110 Profiling." *Science (New York, N.Y.)* 346 (6210): 1257521.  
1111 doi:10.1126/science.1257521.
- 1112 Jung, Hosung, Christos G. Gkogkas, Nahum Sonenberg, and Christine E. Holt. 2014.  
1113 "Remote Control of Gene Function by Local Translation." *Cell* 157 (1): 26–40.  
1114 doi:10.1016/j.cell.2014.03.005.
- 1115 Käll, Lukas, Anders Krogh, and Erik L L Sonnhammer. 2004. "A Combined  
1116 Transmembrane Topology and Signal Peptide Prediction Method." *Journal of*  
1117 *Molecular Biology* 338 (5): 1027–36. doi:10.1016/j.jmb.2004.03.016.
- 1118 Kim, Daehwan, Geo Pertea, Cole Trapnell, Harold Pimentel, Ryan Kelley, and Steven  
1119 L Salzberg. 2013. "TopHat2: Accurate Alignment of Transcriptomes in the  
1120 Presence of Insertions, Deletions and Gene Fusions." *Genome Biology* 14 (4):  
1121 R36. doi:10.1186/gb-2013-14-4-r36.
- 1122 Kind, Jop, and Bas van Steensel. 2010. "Genome–nuclear Lamina Interactions and  
1123 Gene Regulation." *Current Opinion in Cell Biology* 22 (3): 320–25.  
1124 doi:10.1016/j.ceb.2010.04.002.
- 1125 Krogh, A, B Larsson, G von Heijne, and E L Sonnhammer. 2001. "Predicting  
1126 Transmembrane Protein Topology with a Hidden Markov Model: Application to  
1127 Complete Genomes." *Journal of Molecular Biology* 305 (3): 567–80.  
1128 doi:10.1006/jmbi.2000.4315.
- 1129 Lam, Stephanie S, Jeffrey D Martell, Kimberli J Kamer, Thomas J Deerinck, Mark H  
1130 Ellisman, Vamsi K Mootha, and Alice Y Ting. 2014. "Directed Evolution of APEX2  
1131 for Electron Microscopy and Proximity Labeling." *Nature Methods* 12 (1): 51–  
1132 54. doi:10.1038/nmeth.3179.
- 1133 Lee, Je Hyuk, Evan R Daugharthy, Jonathan Scheiman, Reza Kalhor, Ryoji Amamoto,  
1134 Derek T Peters, Brian M Turczyk, et al. 2014. "Highly Multiplexed Subcellular  
1135 RNA Sequencing in Situ." *Science (New York, N.Y.)* 343 (March): 1360–63.  
1136 doi:10.1126/science.1250212.
- 1137 Lesnik, Chen, Adi Golani-Armon, and Yoav Arava. 2015. "Localized Translation near  
1138 the Mitochondrial Outer Membrane: An Update." *RNA Biology* 12 (8): 801–9.  
1139 doi:10.1080/15476286.2015.1058686.
- 1140 Lobingier, Braden T., Ruth Hüttenhain, Kelsie Eichel, Kenneth B. Miller, Alice Y. Ting,  
1141 Mark von Zastrow, and Nevan J. Krogan. 2017. "An Approach to  
1142 Spatiotemporally Resolve Protein Interaction Networks in Living Cells." *Cell*  
1143 169 (2): 350–360.e12. doi:10.1016/j.cell.2017.03.022.
- 1144 Loh, Ken H., Philipp S. Stawski, Austin S. Draycott, Namrata D. Udeshi, Emily K.  
1145 Lehrman, Daniel K. Wilton, Tanya Svinkina, et al. 2016. "Proteomic Analysis of  
1146 Unbounded Cellular Compartments: Synaptic Clefts." *Cell* 166 (5): 1295–1307.  
1147 doi:10.1016/j.cell.2016.07.041.
- 1148 Martell, Jeffrey D, Thomas J Deerinck, Yasemin Sancak, Thomas L Poulos, Vamsi K  
1149 Mootha, Gina E Sosinsky, Mark H Ellisman, and Alice Y Ting. 2012. "Engineered  
1150 Ascorbate Peroxidase as a Genetically Encoded Reporter for Electron

- 1151           Microscopy." *Nature Biotechnology* 30 (11). Nature Publishing Group: 1143–48.  
1152           doi:10.1038/nbt.2375.
- 1153 Martell, Jeffrey D, Masahito Yamagata, Thomas J Deerinck, Sébastien Phan, Carolyn G  
1154 Kwa, Mark H Ellisman, Joshua R Sanes, and Alice Y Ting. 2016. "A Split  
1155 Horseradish Peroxidase for the Detection of Intercellular Protein–protein  
1156 Interactions and Sensitive Visualization of Synapses." *Nature Biotechnology* 34  
1157 (7): 774–80. doi:10.1038/nbt.3563.
- 1158 Mercer, Tim R, Shane Neph, Marcel E Dinger, Joanna Crawford, Martin a Smith,  
1159 Anne-Marie J Shearwood, Eric Haugen, et al. 2011. "The Human Mitochondrial  
1160 Transcriptome." *Cell* 146 (4). Elsevier Inc.: 645–58.  
1161           doi:10.1016/j.cell.2011.06.051.
- 1162 Mick, David U, Rachel B Rodrigues, Ryan D Leib, Christopher M Adams, Allis S Chien,  
1163 Steven P Gygi, and Maxence V Nachury. 2015. "Proteomics of Primary Cilia by  
1164 Proximity Labeling." *Developmental Cell* 35 (4): 497–512.  
1165           doi:10.1016/j.devcel.2015.10.015.
- 1166 Motamedi, Mohammad R, André Verdel, Serafin U Colmenares, Scott A Gerber,  
1167 Steven P Gygi, and Danesh Moazed. 2004. "Two RNAi Complexes, RITS and  
1168 RDRC, Physically Interact and Localize to Noncoding Centromeric RNAs." *Cell*  
1169 119 (6): 789–802. doi:10.1016/j.cell.2004.11.034.
- 1170 Nagao, Asuteka, Narumi Hino-Shigi, and Tsutomu Suzuki. 2008. "Chapter 23  
1171 Measuring mRNA Decay in Human Mitochondria." In , 489–99.  
1172           doi:10.1016/S0076-6879(08)02223-4.
- 1173 Nelles, David A, Mark Y Fang, Mitchell R O'Connell, Jia L Xu, Sebastian J Markmiller,  
1174 Jennifer A Doudna, and Gene W Yeo. 2016. "Programmable RNA Tracking in  
1175 Live Cells with CRISPR/Cas9." *Cell* 165 (2): 488–96.  
1176           doi:10.1016/j.cell.2016.02.054.
- 1177 Paek, Jaeho, Marian Kalocsay, Dean P. Staus, Laura Wingler, Roberta Pascolutti, Joao  
1178 A. Paulo, Steven P. Gygi, and Andrew C. Kruse. 2017. "Multidimensional  
1179 Tracking of GPCR Signaling via Peroxidase-Catalyzed Proximity Labeling." *Cell*  
1180 169 (2): 338–349.e11. doi:10.1016/j.cell.2017.03.028.
- 1181 Pagliarini, David J., Sarah E. Calvo, Betty Chang, Sunil A. Sheth, Scott B. Vafai, Shao-En  
1182 Ong, Geoffrey A. Walford, et al. 2008. "A Mitochondrial Protein Compendium  
1183 Elucidates Complex I Disease Biology." *Cell* 134 (1): 112–23.  
1184           doi:10.1016/j.cell.2008.06.016.
- 1185 Paige, J. S., K. Y. Wu, and S. R. Jaffrey. 2011. "RNA Mimics of Green Fluorescent  
1186 Protein." *Science* 333 (6042): 642–46. doi:10.1126/science.1207339.
- 1187 Petersen, Thomas Nordahl, Søren Brunak, Gunnar von Heijne, and Henrik Nielsen.  
1188 2011. "SignalP 4.0: Discriminating Signal Peptides from Transmembrane  
1189 Regions." *Nature Methods* 8 (10): 785–86. doi:10.1038/nmeth.1701.
- 1190 Piechota, Janusz, Rafał Tomecki, Kamil Gewartowski, Roman Szczesny, Aleksandra  
1191 Dmochowska, Marek Kudła, Lien Dybczyńska, Piotr P Stepien, and Ewa Bartnik.  
1192 2006. "Differential Stability of Mitochondrial mRNA in HeLa Cells." *Acta*  
1193 *Biochimica Polonica* 53 (1): 157–68.
- 1194 Reid, David W, and Christopher V Nicchitta. 2012. "Primary Role for Endoplasmic  
1195 Reticulum-Bound Ribosomes in Cellular Translation Identified by Ribosome  
1196 Profiling." *The Journal of Biological Chemistry* 287 (8): 5518–27.

- 1197 doi:10.1074/jbc.M111.312280.
- 1198 Rhee, Hyun-Woo, Peng Zou, Namrata D Udeshi, Jeffrey D Martell, Vamsi K Mootha,  
1199 Steven a Carr, and Alice Y Ting. 2013. "Proteomic Mapping of Mitochondria in  
1200 Living Cells via Spatially Restricted Enzymatic Tagging." *Science (New York,  
1201 N.Y.)* 339 (6125): 1328–31. doi:10.1126/science.1230593.
- 1202 Rinn, J., and M. Guttman. 2014. "RNA and Dynamic Nuclear Organization." *Science*  
1203 345 (6202): 1240–41. doi:10.1126/science.1252966.
- 1204 Ro, Seungil, Hsiu-Yen Ma, Chanjae Park, Nicole Ortogero, Rui Song, Grant W Hennig,  
1205 Huili Zheng, et al. 2013. "The Mitochondrial Genome Encodes Abundant Small  
1206 Noncoding RNAs." *Cell Research* 23 (6): 759–74. doi:10.1038/cr.2013.37.
- 1207 Roux, Kyle J, Dae In Kim, Manfred Raida, and Brian Burke. 2012. "A Promiscuous  
1208 Biotin Ligase Fusion Protein Identifies Proximal and Interacting Proteins in  
1209 Mammalian Cells." *The Journal of Cell Biology* 196 (6): 801–10.  
1210 doi:10.1083/jcb.201112098.
- 1211 Shechner, David M, Ezgi Haciosuleyman, Scott T Younger, and John L Rinn. 2015.  
1212 "Multiplexable, Locus-Specific Targeting of Long RNAs with CRISPR-Display."  
1213 *Nature Methods* 12 (7): 664–70. doi:10.1038/nmeth.3433.
- 1214 Sterne-Weiler, T., R. T. Martinez-Nunez, J. M. Howard, I. Cvitovik, S. Katzman, M. A.  
1215 Tariq, N. Pourmand, and J. R. Sanford. 2013. "Frac-Seq Reveals Isoform-Specific  
1216 Recruitment to Polyribosomes." *Genome Research* 23 (10): 1615–23.  
1217 doi:10.1101/gr.148585.112.
- 1218 Trapnell, Cole, David G Hendrickson, Martin Sauvageau, Loyal Goff, John L Rinn, and  
1219 Lior Pachter. 2013. "Differential Analysis of Gene Regulation at Transcript  
1220 Resolution with RNA-Seq." *Nature Biotechnology* 31 (1): 46–53.  
1221 doi:10.1038/nbt.2450.
- 1222 Ule, Jernej, Kirk B Jensen, Matteo Ruggiu, Aldo Mele, Aljaz Ule, and Robert B Darnell.  
1223 2003. "CLIP Identifies Nova-Regulated RNA Networks in the Brain." *Science*  
1224 *(New York, N.Y.)* 302 (5648): 1212–15. doi:10.1126/science.1090095.
- 1225 Wilk, Ronit, Jack Hu, Dmitry Blotsky, and Henry M Krause. 2016. "Diverse and  
1226 Pervasive Subcellular Distributions for Both Coding and Long Noncoding  
1227 RNAs." *Genes & Development* 30 (5): 594–609. doi:10.1101/gad.276931.115.
- 1228 Williams, Christopher C, Calvin H Jan, and Jonathan S Weissman. 2014. "Targeting  
1229 and Plasticity of Mitochondrial Proteins Revealed by Proximity-Specific  
1230 Ribosome Profiling." *Science (New York, N.Y.)* 346 (6210): 748–51.  
1231 doi:10.1126/science.1257522.
- 1232 Wishart, J F, and B S Madhava Rao. 2010. *Recent Trends in Radiation Chemistry*.  
1233 Singapore: World Scientific.
- 1234 Zhao, Sheng, and Russell D Fernald. 2005. "Comprehensive Algorithm for  
1235 Quantitative Real-Time Polymerase Chain Reaction." *Journal of Computational*  
1236 *Biology: A Journal of Computational Molecular Cell Biology* 12 (8): 1047–64.  
1237 doi:10.1089/cmb.2005.12.1047.
- 1238
